# Supplementary material
Source: PubMed Central journal article supplement (PMC3243748)
Supplement: supp_kfr267_KFR267_toxsci_11_0713_File006.pdf [file supp_kfr267_KFR267_toxsci_11_0713_File006.pdf]

## SUPPLEMENTAL MATERIALS

### Promotion of Hepatocarcinogenesis by Perfluoroalkyl Acids in Rainbow Trout

Abby D. Benninghoff, Gayle A. Orner, Clarissa H. Buchner, Jerry D. Hendricks,  
Aaron M. Duffy and David E. Williams

#### TABLE OF CONTENTS

Page

##### *Supplemental Tables*

|                                                                                                                                                                          |    |
|--------------------------------------------------------------------------------------------------------------------------------------------------------------------------|----|
| 1. Primer set sequences for real-time RT-PCR validation of gene expression.....                                                                                          | 2  |
| 2. Logistic regression analyses for experimental factors diet, sex, body weight, replicate tank and symptoms of liver disease in AFB <sub>1</sub> -initiated trout ..... | 3  |
| 3. Logistic regression analyses for experimental factors diet, sex, body weight, replicate tank and symptoms of liver disease in MNNG-initiated trout .....              | 4  |
| 4. Summary of array data following application of selection filters for significance, level of response and feature consistency .....                                    | 5  |
| 5. Select genes differentially regulated by experimental diets in trout liver .....                                                                                      | 6  |
| 6. Pearson correlation coefficients ( <i>r</i> ) for pair-wise comparisons by treatment group .....                                                                      | 11 |
| 7. Over-represented Gene Ontology biological process annotations associated with genes induced by the indicated dietary treatments .....                                 | 12 |
| 8. Over-represented Gene Ontology biological process annotations associated with genes repressed by the indicated dietary treatments.....                                | 13 |

##### *Supplemental Figures*

|                                                                                                                                 |    |
|---------------------------------------------------------------------------------------------------------------------------------|----|
| 1. Chemical structures of compounds tested for promotion of hepatocarcinogenesis in rainbow trout .....                         | 20 |
| 2. Outline of AFB <sub>1</sub> and MNNG tumor studies in trout with dietary polyfluorinated chemicals .....                     | 21 |
| 3. Lack of effect of sex, experimental tank or idiopathic liver disease on AFB <sub>1</sub> -induced liver carcinogenesis ..... | 22 |
| 4. Impact of promotion diets on morphological parameters in trout .....                                                         | 24 |
| 5. Lack of effect of sex, experimental tank or idiopathic liver disease on MNNG-induced carcinogenesis .....                    | 25 |
| 6. Quality control analysis of array hybridization .....                                                                        | 26 |
| 7. Unsupervised bidirectional hierarchical cluster analysis of hepatic gene expression profiles.....                            | 27 |
| 8. Directed acyclic graph for enriched GO terms associated with dietary E2.....                                                 | 28 |
| 9. Directed acyclic graph (DAG) for selected enriched GO terms associated with dietary PFNA.....                                | 29 |
| 10. Validation of treatment-induced changes in hepatic gene expression determined by microarray analysis using qRT-PCR .....    | 30 |

|                                      |    |
|--------------------------------------|----|
| <i>Supplemental References</i> ..... | 31 |
|--------------------------------------|----|

## SUPPLEMENTAL TABLES

Supplemental Table 1. Primer set sequences for real-time RT-PCR validation of gene expression

| Gene name (symbol)                                                     | Array feature | Forward primer (5' to 3') | Reverse primer (5' to 3') | Size (bp) | OAT (°C) <sup>f</sup> |
|------------------------------------------------------------------------|---------------|---------------------------|---------------------------|-----------|-----------------------|
| <b>Genes of interest</b>                                               |               |                           |                           |           |                       |
| Alpha-3-macroglobulin ( <i>a2m</i> )                                   | OmyOSU8       | ACAAGGCTCGGGGAATACTT      | CTCCAGCATTGAAGCAGTGA      | 235       | 60                    |
| Cathepsin D ( <i>ctsd</i> ) <sup>a</sup>                               | OmyOSU139     | TCCACTATCCATCATCTACC      | AGATCAGTGCATTTCAACTC      | 272       | 56-58                 |
| Cytochrome P450 1A1 ( <i>cyp1a1</i> ) <sup>b,c</sup>                   | OmyOSU396     | TCAACTTACCTCTGCTGGAAGC    | GGTGAACGGCAGGAAGGA        | 85        | 60                    |
| Cytochrome P450 2K5 ( <i>cyp2k5</i> ) <sup>a</sup>                     | OmyOSU1389    | GTGTCAACTCTAATCTAGTGCCC   | CCGTCCCTGATTGAAGTGAC      | 368       | 58-60                 |
| Hemopexin ( <i>hpx</i> )                                               | OmyOSU699     | GCAGCAGAAGCAAAACATCA      | CAGCACATTCAGAGGGACAA      | 161       | 55                    |
| Prostaglandin D synthase ( <i>pgds</i> ) <sup>a</sup>                  | OmyOSU1395    | CATAATGGGAGTTCTGCTGTG     | TGGGATGTCAGTCTTCTTGG      | 293       | 57                    |
| Trout c-polysaccharide binding protein ( <i>tcpbp</i> ) <sup>e</sup>   | OmyOSU1478    | GGCCAAAGGAGACATCGTTT      | TCCCAACCTACACCCTGACC      | 155       | 62-64                 |
| Thioredoxin ( <i>thx</i> )                                             | OmyOSU1422    | TCCCAACAGCATTGCTCTAA      | CCATGCCTCTAAATCCTCCA      | 122       | 55                    |
| Vitellogenin ( <i>vtg1</i> ) <sup>e</sup>                              | OmyOSU203     | TTGCCTTTGCCAACATCGAC      | CGGACATTGACGTATGCTTT      | 238       | 54                    |
| <b>Genes for normalization</b>                                         |               |                           |                           |           |                       |
| β-actin ( <i>actb</i> ) <sup>a</sup>                                   | OmyOSU205     | GTGCGGGATTATATCATTTACCCT  | CCACGTAGCTGTCTTTCTGG      | 221       | 58-60                 |
| Glyceraldehyde-3-phosphate dehydrogenase ( <i>gapdh</i> ) <sup>a</sup> | OmyOSU229     | CCAACCAAACGCTACCGAAC      | CCAGATCCATCTCACCTT        | 173       | 60                    |
| DNA topoisomerase 2 ( <i>top2a</i> )                                   | OmyOSU1644    | CTGCAGCAGTCCCTCACTT       | CAAAGAAATCCCTCAGCACA      | 100       | 55                    |
| ATP synthase subunit beta ( <i>atp5b</i> )                             | OmyOSU1585    | GCCCATGGTGGTTACTCTGT      | AGGTGTCGTCCTTCAGGTTG      | 112       | 55                    |

<sup>a</sup> Benninghoff and Williams (2008).<sup>b</sup> Primer pair does not surround the sequence for the corresponding 70mer oligonucleotide on the OSUrbt array.<sup>c</sup> Rees and Li (2004).<sup>d</sup> Mortensen *et al.* (2006).<sup>e</sup> Tilton *et al.* (2006).<sup>f</sup> Measured optimal annealing temperature (OAT).

**Supplemental Table 2. Logistic regression analyses for experimental factors diet, sex, body weight, replicate tank and symptoms of liver disease in AFB<sub>1</sub>-initiated trout**

| Treatment                          | Factor                 | All subjects <sup>a</sup> |                           | Final subjects <sup>a</sup> |                           |
|------------------------------------|------------------------|---------------------------|---------------------------|-----------------------------|---------------------------|
|                                    |                        | <i>p</i> -Value           | OR (95% CI)               | <i>p</i> -Value             | OR (95% CI)               |
| AFB <sub>1</sub> /E2               | Diet                   | <b>&lt;0.0001</b>         | <b>34.0 (10.3 - 112)</b>  | <b>&lt;0.0001</b>           | <b>26.4 (7.61 - 91.6)</b> |
|                                    | Sex                    | 0.4478                    | 0.82 (0.49 - 1.38)        | 0.4407                      | 0.08 (0.44 - 1.44)        |
|                                    | Body weight            | <b>0.0027</b>             | <b>1.02 (1.01 - 1.03)</b> | <b>0.0046</b>               | <b>1.02 (1.01 - 1.03)</b> |
|                                    | Replicate tank         | 0.7710                    | 1.08 (0.63 - 1.87)        | 0.2238                      | 1.47 (0.79 - 2.72)        |
|                                    | Liver disease symptoms | 0.0923                    | 0.52 (0.24 - 1.11)        |                             |                           |
| AFB <sub>1</sub> /PFOA             | Diet                   | <b>&lt;0.0001</b>         | <b>25.1 (7.94 - 79.5)</b> | <b>0.0014</b>               | <b>27.3 (3.57 - 209)</b>  |
|                                    | Sex                    | 0.2148                    | 0.73 (0.44 - 1.20)        | 0.5655                      | 0.78 (0.33 - 1.84)        |
|                                    | Body weight            | <b>0.0010</b>             | <b>1.02 (1.01 - 1.03)</b> | <b>0.0384</b>               | <b>1.01 (1.00 - 1.02)</b> |
|                                    | Replicate tank         | 0.5498                    | 0.86 (0.53 - 1.41)        | 0.3298                      | 0.66 (0.29 - 1.52)        |
|                                    | Liver disease symptoms | 0.4167                    | 1.45 (0.59 - 3.54)        |                             |                           |
| AFB <sub>1</sub> /PFNA             | Diet                   | <b>&lt;0.0001</b>         | <b>26.0 (7.09 - 95.1)</b> | <b>&lt;0.0001</b>           | <b>24.2 (5.96 - 98.2)</b> |
|                                    | Sex                    | 0.6675                    | 0.88 (0.50 - 1.57)        | 0.4457                      | 0.78 (0.14 - 1.49)        |
|                                    | Body weight            | <b>0.0003</b>             | <b>1.02 (1.01 - 1.03)</b> | <b>0.0002</b>               | <b>1.02 (1.01 - 1.03)</b> |
|                                    | Replicate tank         | 0.8392                    | 1.06 (0.60 - 1.87)        | 0.4507                      | 1.29 (0.67 - 2.46)        |
|                                    | Liver disease symptoms | 0.7215                    | 1.15 (0.54 - 2.47)        |                             |                           |
| AFB <sub>1</sub> /PFDA             | Diet                   | <b>&lt;0.0001</b>         | <b>41.7 (9.52 - 182)</b>  | <b>&lt;0.0001</b>           | <b>34.0 (6.89 - 168)</b>  |
|                                    | Sex                    | 0.7178                    | 0.88 (0.44 - 1.75)        | 0.9424                      | 0.97 (0.45 - 2.10)        |
|                                    | Body weight            | <b>0.0102</b>             | <b>1.01 (1.00 - 1.02)</b> | <b>0.0186</b>               | <b>1.01 (1.00 - 1.03)</b> |
|                                    | Replicate tank         | 0.7750                    | 1.11 (0.56 - 2.20)        | 0.3806                      | 1.45 (0.63 - 3.34)        |
|                                    | Liver disease symptoms | 0.9061                    | 1.06 (0.42 - 2.69)        |                             |                           |
| AFB <sub>1</sub> /8:2FtOH          | Diet                   | 0.1652                    | 2.34 (0.70 - 7.78)        | 0.5649                      | 1.51 (0.37 - 6.11)        |
|                                    | Sex                    | 0.9379                    | 1.02 (0.62 - 1.69)        | 0.5693                      | 1.18 (0.66 - 2.12)        |
|                                    | Body weight            | <b>&lt;0.0001</b>         | <b>1.02 (1.01 - 1.03)</b> | <b>&lt;0.0001</b>           | <b>1.02 (1.01 - 1.03)</b> |
|                                    | Replicate tank         | 0.8213                    | 1.06 (0.62 - 1.82)        | 0.4806                      | 1.25 (0.67 - 2.31)        |
|                                    | Liver disease symptoms | <b>0.0064</b>             | <b>2.43 (1.28 - 4.61)</b> |                             |                           |
| AFB <sub>1</sub> /CLOF             | Diet                   | 0.8866                    | 0.92 (0.27 - 3.11)        | 0.3397                      | 0.51 (0.13 - 2.05)        |
|                                    | Sex                    | 0.0428                    | 0.55 (0.31 - 0.98)        | 0.2793                      | 0.71 (0.38 - 1.32)        |
|                                    | Body weight            | <b>0.0003</b>             | <b>1.01 (1.01 - 1.02)</b> | <b>0.0016</b>               | <b>1.01 (1.01 - 1.02)</b> |
|                                    | Replicate tank         | 0.3261                    | 1.32 (0.76 - 2.31)        | 0.1199                      | 1.65 (0.88 - 3.12)        |
|                                    | Liver disease symptoms | <b>0.0195</b>             | <b>2.27 (1.14 - 4.53)</b> |                             |                           |
| AFB <sub>1</sub> /PFOS<br>(15 wks) | Diet                   | <b>0.0025</b>             | <b>19.2 (2.83 - 131)</b>  | <b>0.0014</b>               | <b>27.3 (3.57 - 209)</b>  |
|                                    | Sex                    | 0.9021                    | 0.95 (0.42 - 2.12)        | 0.5655                      | 0.78 (0.33 - 1.84)        |
|                                    | Body weight            | 0.0559                    | 1.01 (1.00 - 1.02)        | <b>0.0384</b>               | <b>1.01 (1.00 - 1.02)</b> |
|                                    | Replicate tank         | 0.3349                    | 0.68 (0.31 - 1.50)        | 0.3298                      | 0.66 (0.29 - 1.52)        |
|                                    | Liver disease symptoms | 0.9054                    | 1.10 (0.23 - 5.17)        |                             |                           |

<sup>a</sup> Logistic regression analysis was performed including all experimental subjects to determine the impact of five experimental factors on liver tumor outcome in AFB<sub>1</sub>-initiated trout; all comparisons were made compared to the AFB<sub>1</sub>/CON treatment group, except for the PFOS treatment which was compared to AFB<sub>1</sub>(15wk)/CON. Firth's bias correction was used as the likelihood penalty when a maximum likelihood estimate was not obtained. Chi-square *P*-values and odds ratios (OR) with 95% confidence intervals (CI) are shown. A significant effect of the indicated experimental factor was inferred when *p*<0.05.

<sup>b</sup> Logistic regression analyses were performed as before, but subjects with symptoms of idiopathic liver disease were excluded; thus, only four experimental factors were evaluated.

**Supplemental Table 3. Logistic regression analyses for experimental factors diet, sex, body weight, replicate tank and symptoms of liver disease in MNNG-initiated trout**

| Treatment                                  | Factor                 | Liver tumors <sup>c</sup> |                           | Kidney tumors <sup>c</sup> |                    | Stomach tumors <sup>c</sup> |                    | Swim bladder tumors <sup>c</sup> |                            |
|--------------------------------------------|------------------------|---------------------------|---------------------------|----------------------------|--------------------|-----------------------------|--------------------|----------------------------------|----------------------------|
|                                            |                        | <i>p</i> -Value           | OR (95% CI)               | <i>p</i> -Value            | OR (95% CI)        | <i>p</i> -Value             | OR (95% CI)        | <i>p</i> -Value                  | OR (95% CI)                |
| <b>Including all subjects <sup>a</sup></b> |                        |                           |                           |                            |                    |                             |                    |                                  |                            |
| MNNG/E2                                    | Diet                   | <b>&lt;0.0001</b>         | <b>17.7 (4.98 – 62.6)</b> | 0.1946                     | 2.00 (0.70 - 5.70) | 0.0512                      | 190 (0.97 - ∞)     | <b>0.0134</b>                    | <b>3.76 (1.32 - 10.7)</b>  |
|                                            | Sex                    | 0.0861                    | 1.58 (0.94 - 2.68)        | 0.7165                     | 1.09 (0.70 - 1.70) | 0.5341                      | 1.74 (0.30 - 9.93) | <b>0.0079</b>                    | <b>1.84 (1.17 - 2.88)</b>  |
|                                            | Body weight            | 0.1702                    | 1.01 (1.00 - 1.01)        | 0.3607                     | 1.00 (1.00 - 1.01) | 0.4075                      | 0.99 (0.97 - 1.01) | <b>0.0044</b>                    | <b>1.01 (1.00 - 1.02)</b>  |
|                                            | Tank                   | 0.6588                    | 0.88 (0.50 - 1.56)        | 0.3450                     | 0.80 (0.49 - 1.28) | 0.0523                      | 0.07 (0.01 - 1.03) | <b>0.0139</b>                    | <b>0.55 (0.34 - 0.89)</b>  |
|                                            | Liver disease symptoms | 0.1007                    | 0.58 (0.30 - 1.11)        | 0.0201                     | 0.51 (0.29 - 0.90) | 0.2097                      | 0.25 (0.03 - 2.21) | 0.3785                           | 1.28 (0.74 - 2.22)         |
| MNNG/PFOA                                  | Diet                   | <b>&lt;0.0001</b>         | <b>17.1 (5.04 - 57.9)</b> | 0.8457                     | 0.90 (0.30 - 2.68) | 0.3915                      | 0.13 (0.00 - 14.4) | <b>&lt;0.0001</b>                | <b>12.3 (3.92 - 38.4)</b>  |
|                                            | Sex                    | 0.5145                    | 1.18 (0.71 - 1.97)        | 0.8797                     | 1.04 (0.65 - 1.66) | 0.2572                      | 3.65 (0.39 - 34.4) | 0.5430                           | 1.42 (0.88 - 2.31)         |
|                                            | Body weight            | 0.1001                    | 1.01 (1.00 - 1.01)        | 0.1867                     | 1.01 (1.00 - 1.01) | 0.5701                      | 0.99 (0.97 - 1.02) | <b>0.0005</b>                    | <b>1.01 (1.01 - 1.02)</b>  |
|                                            | Tank                   | 0.2723                    | 0.75 (0.44 - 1.26)        | 0.8432                     | 0.95 (0.59 - 1.55) | 0.8590                      | 1.18 (0.18 - 7.60) | <b>&lt;0.0001</b>                | <b>0.29 (0.17 - 0.47)</b>  |
|                                            | Liver disease symptoms | 0.3296                    | 0.70 (0.34 - 1.44)        | 0.7962                     | 0.92 (0.48 - 1.75) | 0.1657                      | 0.18 (0.02 - 2.04) | 0.1813                           | 1.58 (0.81 - 3.06)         |
| <b>Final subjects <sup>b</sup></b>         |                        |                           |                           |                            |                    |                             |                    |                                  |                            |
| MNNG/E2                                    | Diet                   | <b>&lt;0.0001</b>         | <b>18.9 (4.37 – 82.2)</b> | 0.1127                     | 2.58 (0.80 – 8.36) | 0.3497                      | 14.0 (0.06 - ∞)    | <b>0.0083</b>                    | <b>5.05 (1.52 – 16.8)</b>  |
|                                            | Sex                    | 0.2360                    | 1.47 (0.78 – 2.77)        | 0.7898                     | 1.07 (0.64 - 1.79) | 0.7729                      | 1.33 (0.20 – 8.94) | 0.0857                           | 1.58 (0.94 – 2.67)         |
|                                            | Body weight            | 0.1525                    | 1.01 (1.00 – 1.02)        | 0.7820                     | 1.00 (0.99 – 1.01) | 0.5054                      | 0.99 (0.97 - 1.02) | 0.0677                           | 1.01 (1.00 - 1.02)         |
|                                            | Tank                   | 0.9725                    | 0.99 (0.52 – 1.88)        | 0.3355                     | 0.78 (0.46 – 1.30) | 0.3316                      | 0.28 (0.02 – 3.64) | <b>0.0230</b>                    | <b>0.55 (0.33 – 0.92)</b>  |
| MNNG/PFOA                                  | Diet                   | <b>&lt;0.0001</b>         | <b>17.0 (4.47 – 64.4)</b> | 0.4424                     | 0.63 (0.19 – 2.07) | 0.3163                      | 0.05 (0.00 – 18.5) | <b>&lt;0.0001</b>                | <b>12.47 (3.59 – 43.4)</b> |
|                                            | Sex                    | 0.8812                    | 0.96 (0.54 – 1.69)        | 0.8380                     | 0.95 (0.56 – 1.61) | 0.5522                      | 2.11 (0.18 – 24.7) | 0.5034                           | 1.20 (0.70 – 2.07)         |
|                                            | Body weight            | <b>0.0213</b>             | <b>1.01 (1.00 – 1.02)</b> | 0.7580                     | 1.00 (0.99 - 1.01) | 0.2675                      | 0.98 (0.95 - 1.01) | <b>0.0074</b>                    | <b>1.01 (1.00 – 1.02)</b>  |
|                                            | Tank                   | 0.5656                    | 0.85 (0.48 – 1.50)        | 0.7980                     | 1.07 (0.63 – 1.83) | 0.4622                      | 2.56 (0.21 – 31.4) | <b>&lt;0.0001</b>                | <b>0.28 (0.17 – 0.50)</b>  |

<sup>a</sup> Logistic regression analysis was performed including all experimental subjects to determine the impact of five experimental factors on liver tumor outcome in MNNG-initiated trout; all comparisons were made compared to the MNNG/CON treatment group. Firth's bias correction was used as the likelihood penalty when a maximum likelihood estimate was not obtained.

<sup>b</sup> Logistic regression analyses were performed as before, but subjects with symptoms of idiopathic liver disease were excluded; thus, only four experimental factors were evaluated.

<sup>c</sup> Chi-square *P*-values and odds ratios (OR) with 95% confidence intervals (CI) are shown. A significant effect of the indicated experimental factor was inferred when *p*<0.05.

**Supplemental Table 4. Summary of array data following application of selection filters for significance, level of response and feature consistency**

| Treatment | Number of features passing indicated criterion |                                 |                               |                           |                                               |
|-----------|------------------------------------------------|---------------------------------|-------------------------------|---------------------------|-----------------------------------------------|
|           | Welch's <i>t</i> -test <sup>a</sup>            | Mean 2-fold change <sup>b</sup> | Spot consistency <sup>c</sup> | All criteria <sup>d</sup> | Portion of array differentially regulated (%) |
| CON       | N/A                                            | 3                               | 0                             | 0                         | 0                                             |
| E2        | 266                                            | 103                             | 107                           | 60                        | 3.8                                           |
| PFOA      | 205                                            | 109                             | 118                           | 88                        | 5.3                                           |
| PFNA      | 342                                            | 266                             | 241                           | 175                       | 10.8                                          |
| PFDA      | 230                                            | 139                             | 132                           | 91                        | 5.6                                           |
| PFOS      | 204                                            | 115                             | 73                            | 44                        | 2.8                                           |
| 8:2FtOH   | 99                                             | 35                              | 33                            | 26                        | 1.7                                           |
| CLOF      | 101                                            | 21                              | 21                            | 5                         | 0.30                                          |

<sup>a</sup> Number of array features that were identified as significantly regulated by the Welch's *t*-test ( $p < 0.05$ ) when comparing each experimental treatment to CON ( $n = 3$ ).

<sup>b</sup> Number of array features for which a minimum 2-fold change in the geometric mean of expression values was observed.

<sup>c</sup> Number of array features for which 9 out of 10 spots (including all technical and biological replicates) were differentially regulated >1.5-fold.

<sup>d</sup> Number of array features that passed all filtering criteria.

**Supplemental Table 5. Select genes differentially regulated by experimental diets in trout liver.**

| Array ID                                                                                           | DFCI ID <sup>a</sup> | Gene name (accession number; species)                                                        | Symbol         | Mean log <sub>2</sub> fold-change in gene expression by treatment <sup>b</sup> |        |        |        |        |       |       |       |
|----------------------------------------------------------------------------------------------------|----------------------|----------------------------------------------------------------------------------------------|----------------|--------------------------------------------------------------------------------|--------|--------|--------|--------|-------|-------|-------|
|                                                                                                    |                      |                                                                                              |                | CON                                                                            | E2     | PFOA   | PFNA   | PFDA   | PFOS  | FTOH  | CLOF  |
| <b>Liver-specific proteins (vitellogenesis)</b>                                                    |                      |                                                                                              |                |                                                                                |        |        |        |        |       |       |       |
| OmyOSU208                                                                                          | TC132491             | Vitellogenin (Q92093; <i>Oncorhynchus mykiss</i> ) <sup>c</sup>                              | <i>vtg1</i>    | -0.27                                                                          | 6.07*  | 6.61*  | 6.22*  | 6.07*  | 5.62* | 5.83* | -0.12 |
| OmyOSU1552                                                                                         | BX306977             | Vitelline Envelope Protein gamma (Q9I9M6; <i>O. mykiss</i> )                                 | <i>veg</i>     | -0.26                                                                          | 5.79*  | 5.78*  | 5.22*  | 5.67*  | 4.87* | 4.40* | 0.11  |
| OmyOSU1540                                                                                         | TC133595             | Vitelline Envelope Protein alpha (Q9I9M8; <i>O. mykiss</i> )                                 | <i>vepa</i>    | -0.21                                                                          | 5.76*  | 5.84*  | 5.27*  | 5.74*  | 5.39* | 5.11* | 0.49  |
| OmyOSU1542                                                                                         | TC169120             | Zona radiata structural protein (Q90XC3; <i>O. mykiss</i> )                                  | <i>zrp</i>     | -0.02                                                                          | 5.73*  | 5.38*  | 5.41*  | 5.75*  | 5.38* | 4.92* | 0.70  |
| <b>Cell proliferation (cell signaling, regulation of transcription, cell growth and apoptosis)</b> |                      |                                                                                              |                |                                                                                |        |        |        |        |       |       |       |
| OmyOSU244                                                                                          | NP543968             | Estrogen receptor beta (P57782; <i>O. mykiss</i> )                                           | <i>esr2</i>    | -0.27                                                                          | 5.53*  | 6.41*  | 5.49   | 5.66*  | 3.75* | 4.79* | 0.01  |
| OmyOSU1015                                                                                         | RTL00033             | Inhibitor of <i>NFκB</i> subunit alpha (Q4G3H4; <i>Danio rerio</i> ) <sup>c</sup>            | <i>ikk1</i>    | -0.01                                                                          | 4.72*  | 5.15*  | 4.67   | 4.22*  | 3.67* | 2.79* | 0.30  |
| OmyOSU127                                                                                          | TC146408             | Nuclear factor NF-kappa-B p105 subunit (A3FJ60; <i>Siniperca chuatsi</i> )                   | <i>nfkb1</i>   | -0.50                                                                          | 3.78*  | 3.75*  | 4.20*  | 2.78*  | 2.77* | 2.27* | 0.07  |
| OmyOSU212                                                                                          | TC138144             | TATA box binding protein (C0HA61; <i>Salmo salar</i> )                                       | <i>tbp</i>     | -0.39                                                                          | 2.97*  | 2.81*  | 3.48*  | 3.10*  | 1.16  | 1.45  | -0.07 |
| OmyOSU151                                                                                          | TC162795             | Estrogen receptor alpha (P16058; <i>O. mykiss</i> ) <sup>c</sup>                             | <i>esr1</i>    | 0.20                                                                           | 2.46*  | 3.62*  | 2.94*  | 3.04*  | 2.18* | 1.85* | 0.85  |
| OmyOSU1667                                                                                         | TC169305             | Poly A binding protein, cytoplasmic 1 b (Q6P3L1; <i>D. rerio</i> )                           | <i>pabpc1b</i> | 0.04                                                                           | 1.59*  | 1.73*  | 2.01*  | 1.43   | 0.93  | 0.38  | 0.08  |
| OmyOSU1191                                                                                         | TC146689             | NF-kappa-B inhibitor epsilon (B5X3Y7; <i>S. salar</i> )                                      | <i>ikbe</i>    | 0.09                                                                           | 1.42*  | 0.83   | 1.31*  | 1.06   | 0.16  | 0.41  | 0.11  |
| OmyOSU1484                                                                                         | TC150787             | Tryptophanyl-tRNA synthetase (Q28BU4; <i>Xenopus tropicalis</i> )                            | <i>wars</i>    | -0.07                                                                          | 0.81   | 0.38   | 2.04*  | 0.85   | 0.22  | 0.24  | 0.41  |
| OmyOSU1615                                                                                         | TC141666             | Transmembrane 4 superfamily member protein (Q9DFD3; <i>O. mykiss</i> )                       | <i>tm4sf</i>   | 0.09                                                                           | 0.73   | 0.50   | 1.58*  | 0.98   | 0.12  | -0.05 | 0.22  |
| OmyOSU803                                                                                          | BX079929             | Growth arrest and DNA-damage-inducible, beta (C1BER7; <i>O. mykiss</i> )                     | <i>ga45b</i>   | -0.12                                                                          | 0.43   | 0.39   | 1.92*  | 1.04   | -0.33 | -0.11 | -0.18 |
| OmyOSU1428                                                                                         | TC143767             | Reticulon RTN9-A1 (Q6IEJ0; <i>O. mykiss</i> )                                                | <i>rtn9-a1</i> | -0.01                                                                          | 0.03   | 1.71   | 1.21   | 1.00   | 0.47  | 0.53  | 0.42  |
| OmyOSU1427                                                                                         | TC140351             | Reticulon RTN9-A2 (Q6IEI9; <i>O. mykiss</i> )                                                | <i>rtn9-a2</i> | -0.06                                                                          | 0.42   | 1.12   | 0.68   | 0.79   | 0.06  | 0.18  | 0.18  |
| OmyOSU1669                                                                                         | NP814796             | Tumor necrosis factor receptor associated factor 2 (Q7T2X2; <i>O. mykiss</i> )               | <i>traf2</i>   | 0.08                                                                           | -0.37  | -1.57* | -1.61* | -1.67* | -0.65 | -0.06 | -0.05 |
| OmyOSU387                                                                                          | TC156633             | Allograft inflammatory factor 1 (B5XGK1; <i>S. salar</i> )                                   | <i>aif1</i>    | 0.23                                                                           | -0.70  | -1.07  | -2.72* | -1.59* | -0.12 | -0.39 | -0.28 |
| OmyOSU725                                                                                          | CA379375             | Putative hepatocyte growth factor activator (Q9DFD4; <i>O. mykiss</i> )                      | <i>hgfac</i>   | -0.01                                                                          | -1.29  | -0.80  | -1.58* | -1.19* | 0.17  | -0.39 | -0.11 |
| OmyOSU313                                                                                          | TC132515             | Bone morphogenetic protein-7 (Q5BN41; <i>O. mykiss</i> )                                     | <i>bmp7</i>    | 0.07                                                                           | -1.35* | -1.34* | -1.84* | -0.98  | -0.54 | 0.16  | 0.27  |
| OmyOSU916                                                                                          | NP544392             | Mixed lineage leukemia-like protein (Q9PT21; <i>O. mykiss</i> )                              | <i>mll</i>     | 0.01                                                                           | -1.61* | -1.46* | -2.52* | -1.84* | -0.34 | -0.45 | -0.16 |
| <b>Protein stability and transport</b>                                                             |                      |                                                                                              |                |                                                                                |        |        |        |        |       |       |       |
| OmyOSU893                                                                                          | TC145126             | Heat shock protein 90 (P87397; <i>Oncorhynchus tshawytscha</i> )                             | <i>hsp90</i>   | 0.19                                                                           | 2.58*  | 3.61*  | 3.37*  | 2.37   | 1.20  | 1.17* | 0.64  |
| OmyOSU139                                                                                          | TC150271             | Cathepsin D (P87370; <i>O. mykiss</i> )                                                      | <i>ctsd</i>    | -0.17                                                                          | 1.99*  | 1.44*  | 1.88*  | 1.29*  | 0.98  | 0.28  | 0.05  |
| OmyOSU1308                                                                                         | TC164544             | Protein transport protein Sec61 α subunit isoform B (Q98SN8; <i>O. mykiss</i> ) <sup>c</sup> | <i>sec61ab</i> | 0.16                                                                           | 1.89*  | 1.14*  | 1.59*  | 1.20*  | 0.50  | 0.42  | 0.82  |
| OmyOSU859                                                                                          | TC145413             | Heat shock protein 47 (Q5DW60; <i>O. mykiss</i> )                                            | <i>hsp47</i>   | 0.22                                                                           | 1.11*  | 0.28   | 1.91*  | 0.38   | 0.39  | 0.34  | 0.31  |
| OmyOSU1602                                                                                         | TC160913             | Coatomer subunit epsilon (C1BG73; <i>O. mykiss</i> )                                         | <i>cope</i>    | 0.06                                                                           | 0.97   | 0.39   | 1.17*  | 0.71   | 0.02  | 0.34  | 0.26  |

**Supplemental Table 5. Select genes differentially regulated by experimental diets in trout liver.**

| Array ID                         | DFCI ID <sup>a</sup> | Gene name (accession number; species)                                             | Symbol         | Mean log <sub>2</sub> fold-change in gene expression by treatment <sup>b</sup> |               |               |               |               |              |              |              |
|----------------------------------|----------------------|-----------------------------------------------------------------------------------|----------------|--------------------------------------------------------------------------------|---------------|---------------|---------------|---------------|--------------|--------------|--------------|
|                                  |                      |                                                                                   |                | CON                                                                            | E2            | PFOA          | PFNA          | PFDA          | PFOS         | FTOH         | CLOF         |
| OmyOSU85                         | TC132785             | Proteasome subunit beta type (B5XAY5; <i>S. salar</i> )                           | <i>psb7</i>    | 0.32                                                                           | 0.52          | 0.74          | <b>1.43*</b>  | <b>1.03*</b>  | 0.61         | 0.49         | 0.40         |
| OmyOSU861                        | TC161889             | 60 kDa Heat shock protein, mitochondrial (COHBF1; <i>S. salar</i> )               | <i>ch60</i>    | 0.16                                                                           | 0.32          | 0.20          | <b>1.78*</b>  | 0.52          | <b>1.14*</b> | 0.62         | 0.17         |
| OmyOSU216                        | BX315865             | 40S Ribosomal protein S11 (Q9DF27; <i>S. salar</i> )                              | <i>rs11</i>    | -0.28                                                                          | 0.21          | 0.71          | <b>1.09*</b>  | 0.35          | -0.10        | -0.15        | -0.01        |
| OmyOSU910                        | TC132590             | Proteasome subunit beta type 9 precursor (Q9PT26; <i>O. mykiss</i> )              | <i>psmb9</i>   | -0.24                                                                          | -0.11         | 0.51          | <b>1.37*</b>  | 0.16          | -0.20        | -0.09        | 0.37         |
| OmyOSU1042                       | BX879214             | Ubiquitin B (B9EQM0; <i>S. salar</i> )                                            | <i>ubb</i>     | -0.17                                                                          | -0.13         | 0.13          | 0.13          | 0.34          | <b>1.09*</b> | 0.16         | <b>1.02*</b> |
| <b>Phase I and II metabolism</b> |                      |                                                                                   |                |                                                                                |               |               |               |               |              |              |              |
| OmyOSU1380                       | TC150232             | Cytochrome P450 2k1 (Q92090; <i>O. mykiss</i> ) <sup>c</sup>                      | <i>cyp2k1</i>  | 0.15                                                                           | 1.41          | <b>3.68*</b>  | <b>3.27*</b>  | <b>3.04</b>   | <b>3.11</b>  | 0.25         | 0.81         |
| OmyOSU754                        | TC146311             | Microsomal glutathione S-transferase (C1BFV1; <i>O. mykiss</i> )                  | <i>mgst</i>    | 0.16                                                                           | -0.10         | 0.23          | 1.39          | 0.58          | <b>1.01*</b> | <b>1.89*</b> | <b>1.27</b>  |
| OmyOSU396                        | TC158463             | Cytochrome P450 1a1 (Q92110; <i>O. mykiss</i> ) <sup>c</sup>                      | <i>cyp1a1</i>  | 0.43                                                                           | -0.26         | <b>-1.58*</b> | <b>-2.44*</b> | -0.59         | -0.07        | -0.42        | -0.35        |
| OmyOSU993                        | TC147595             | Glutathione S-transferase Mu 3 (C1BZU6; <i>Esox lucius</i> )                      | <i>gstm3</i>   | 0.22                                                                           | -0.27         | -0.48         | <b>-2.47*</b> | -0.89         | -0.66        | 0.10         | -0.28        |
| OmyOSU1134                       | TC143007             | Cytosolic sulfotransferase 2 (B5X695; <i>S. salar</i> )                           | <i>st2s2</i>   | 0.04                                                                           | -0.31         | 0.48          | -0.15         | 0.39          | <b>1.19*</b> | 0.23         | 0.48         |
| OmyOSU1203                       | BX306987             | Microsomal glutathione S-transferase 1 (C1BM45; <i>Osmerus mordax</i> )           | <i>gst1</i>    | 0.25                                                                           | -0.34         | 0.01          | <b>-1.62*</b> | -0.46         | 0.14         | 0.59         | 0.40         |
| OmyOSU1507                       | BX085479             | Glutathione S-transferase (Q9W647; <i>Oncorhynchus nerka</i> )                    | <i>gstp1</i>   | 0.25                                                                           | -0.35         | -0.32         | 0.05          | -0.45         | 0.07         | <b>1.19*</b> | 0.65         |
| OmyOSU829                        | BX085279             | Carbonyl reductase (Q9PT38; <i>O. mykiss</i> )                                    | <i>cbr1</i>    | -0.06                                                                          | -0.35         | 0.53          | 0.31          | 0.24          | <b>1.26*</b> | <b>1.20*</b> | 0.94         |
| OmyOSU115                        | BX310129             | Glutathione S-transferase P (B5XC10; <i>S. salar</i> )                            | <i>gstp1</i>   | 0.21                                                                           | -0.36         | -0.12         | -0.63         | -0.29         | -0.25        | <b>3.03*</b> | 0.20         |
| OmyOSU398                        | TC139996             | Cytochrome P450 3a27 (O42563; <i>O. mykiss</i> ) <sup>c</sup>                     | <i>cyp3a27</i> | 0.06                                                                           | -0.96         | 0.58          | 0.58          | -0.27         | <b>2.07*</b> | -0.05        | 0.69         |
| OmyOSU356                        | TC150068             | Cytochrome P450 2j24 (Q5TZ75; <i>D. rerio</i> )                                   | <i>cyp2j24</i> | -0.08                                                                          | <b>-1.24*</b> | -0.55         | <b>-2.32*</b> | <b>-1.07*</b> | 0.59         | -0.04        | 0.04         |
| OmyOSU460                        | TC134882             | 3-Oxo-5-beta-steroid 4-dehydrogenase (B9EMZ1; <i>S. salar</i> )                   | <i>ark1d1</i>  | -0.15                                                                          | -1.41         | <b>-1.94*</b> | <b>-3.74*</b> | <b>-1.75*</b> | -0.23        | -0.18        | -0.47        |
| OmyOSU1389                       | TC133687             | Cytochrome P450 2k5 (Q9IAT1; <i>O. mykiss</i> ) <sup>c</sup>                      | <i>cyp2k5</i>  | -0.10                                                                          | <b>-1.58*</b> | <b>1.39*</b>  | 0.15          | 0.76          | <b>2.82*</b> | -0.08        | <b>1.67*</b> |
| OmyOSU392                        | CB491885             | Cytochrome P450 2m1 (Q92088; <i>O. mykiss</i> ) <sup>c</sup>                      | <i>cyp2m1</i>  | 0.19                                                                           | <b>-1.77*</b> | <b>-2.27*</b> | <b>-2.61*</b> | <b>-1.42*</b> | -0.08        | 0.16         | 0.10         |
| <b>Redox regulation</b>          |                      |                                                                                   |                |                                                                                |               |               |               |               |              |              |              |
| OmyOSU245                        | TC152739             | Succinate dehydrogenase complex subunit A flavoprotein (B5DFZ8; <i>S. salar</i> ) | <i>sdha</i>    | 0.22                                                                           | 1.98          | 1.88          | <b>1.88</b>   | <b>2.62</b>   | <b>1.26</b>  | <b>1.15</b>  | 0.36         |
| OmyOSU238                        | TC147716             | Glutathione peroxidase (D2CKK9; <i>D. rerio</i> )                                 | <i>gpx4a</i>   | 0.08                                                                           | <b>1.21</b>   | <b>1.61</b>   | <b>2.29</b>   | <b>2.22</b>   | 0.03         | 0.57         | 0.14         |
| OmyOSU1490                       | TC135270             | Cytochrome c oxidase subunit 3 (P69218; <i>O. nerka</i> )                         | <i>cox3</i>    | -0.18                                                                          | 1.20          | <b>1.49</b>   | <b>1.75</b>   | 1.26          | 0.40         | 0.16         | 0.02         |
| OmyOSU32                         | TC132824             | Glutathione peroxidase (B5RI90; <i>S. salar</i> )                                 | <i>gpx4b</i>   | -0.07                                                                          | 0.32          | 0.40          | <b>1.08</b>   | 0.36          | 0.07         | -0.11        | 0.16         |
| OmyOSU55                         | TC143718             | Peroxiredoxin-5, mitochondrial (B5X5Q6; <i>S. salar</i> )                         | <i>prdx5</i>   | 0.42                                                                           | 0.26          | 0.69          | <b>1.56</b>   | 0.89          | 0.36         | 0.60         | 0.92         |
| OmyOSU1633                       | CA373161             | Cytochrome C-1 (Q3B7R0; <i>D. rerio</i> )                                         | <i>cyc1</i>    | 0.10                                                                           | 0.23          | 0.48          | <b>1.72</b>   | 0.84          | 0.45         | 0.08         | 0.20         |
| OmyOSU92                         | BX074038             | Cu/Zn-superoxide dismutase (C1BFL3; <i>O. mykiss</i> )                            | <i>sod1</i>    | 0.29                                                                           | 0.21          | 0.50          | <b>1.01</b>   | 0.46          | 0.07         | -0.03        | 0.33         |
| OmyOSU572                        | TC156955             | Cytochrome c oxidase polypeptide Via (O13085; <i>O. mykiss</i> )                  | <i>coxa</i>    | 0.12                                                                           | 0.05          | 0.03          | <b>-1.86</b>  | -0.46         | 0.16         | -0.09        | 0.20         |
| OmyOSU566                        | CU068081             | Peroxisomal carnitine O-octanoyltransferase (Q503F8; <i>D. rerio</i> )            | <i>crot</i>    | -0.14                                                                          | -0.02         | 0.20          | -0.29         | -0.24         | 0.31         | -0.18        | -0.11        |

**Supplemental Table 5. Select genes differentially regulated by experimental diets in trout liver.**

| Array ID                                                | DFCI ID <sup>a</sup> | Gene name (accession number; species)                                             | Symbol        | Mean log <sub>2</sub> fold-change in gene expression by treatment <sup>b</sup> |               |               |               |               |               |              |       |
|---------------------------------------------------------|----------------------|-----------------------------------------------------------------------------------|---------------|--------------------------------------------------------------------------------|---------------|---------------|---------------|---------------|---------------|--------------|-------|
|                                                         |                      |                                                                                   |               | CON                                                                            | E2            | PFOA          | PFNA          | PFDA          | PFOS          | FTOH         | CLOF  |
| OmyOSU325                                               | TC146929             | Acetyl-CoA acetyltransferase, mitochondrial (Q6AZA0; <i>D. rerio</i> )            | <i>acat1</i>  | -0.22                                                                          | -0.03         | -0.10         | -0.20         | -0.04         | 0.22          | -0.25        | -0.13 |
| OmyOSU1422                                              | TC147703             | Thioredoxin (C1BH85; <i>O. mykiss</i> )                                           | <i>trx</i>    | -0.68                                                                          | -0.41         | -0.07         | <b>2.48</b>   | 0.27          | 0.59          | <b>1.54</b>  | 0.34  |
| OmyOSU37                                                | TC141467             | Catalase (C0HAV1; <i>S. salar</i> )                                               | <i>cat</i>    | 0.04                                                                           | -0.75         | -0.76         | <b>-1.38</b>  | -1.00         | 0.02          | -0.07        | -0.23 |
| <b>Extracellular matrix and vascularization factors</b> |                      |                                                                                   |               |                                                                                |               |               |               |               |               |              |       |
| OmyOSU1557                                              | TC135220             | Secreted protein acidic and rich in cysteine protein (Q9YGD9; <i>O. mykiss</i> )  | <i>sparc</i>  | -0.03                                                                          | -0.79         | -0.68         | <b>-1.21*</b> | -0.18         | -0.52         | -0.31        | -0.28 |
| OmyOSU419                                               | CA356156             | Angiogenin (B5XAZ0; <i>S. salar</i> )                                             | <i>ang1</i>   | -0.23                                                                          | <b>-1.44*</b> | <b>-1.70*</b> | <b>-1.95*</b> | <b>-1.50*</b> | 0.03          | -0.28        | 0.11  |
| <b>Immune response</b>                                  |                      |                                                                                   |               |                                                                                |               |               |               |               |               |              |       |
| OmyOSU1564                                              | TC140147             | VHSV4 (Q8QGB4; <i>O. mykiss</i> )                                                 | <i>vhsv4</i>  | 0.04                                                                           | <b>5.62*</b>  | <b>6.32*</b>  | <b>5.57*</b>  | <b>6.11*</b>  | <b>4.90*</b>  | <b>4.26*</b> | -0.13 |
| OmyOSU1566                                              | TC132651             | VHSV6 (Q8QGB2; <i>O. mykiss</i> )                                                 | <i>vhsv6</i>  | 0.15                                                                           | <b>3.88*</b>  | <b>3.90*</b>  | <b>3.36*</b>  | <b>3.78*</b>  | <b>1.92*</b>  | 1.93         | 0.02  |
| OmyOSU582                                               | TC167667             | P-selectin (B5X3V6; <i>S. salar</i> )                                             | <i>lyam3</i>  | 0.18                                                                           | <b>1.65*</b>  | 0.99          | 0.99          | 0.62          | 0.55          | -0.13        | 0.54  |
| OmyOSU1590                                              | TC132541             | VHSV-induced protein 2 (Q9DD73; <i>O. mykiss</i> )                                | <i>vhsv2</i>  | -0.16                                                                          | 0.83          | 0.58          | <b>1.08*</b>  | 0.30          | 0.13          | -0.17        | 0.10  |
| OmyOSU148                                               | TC161751             | Differentially regulated trout protein 1 (Q9DFD5; <i>O. mykiss</i> ) <sup>c</sup> | <i>drtp1</i>  | -0.04                                                                          | 0.71          | 0.16          | <b>4.02*</b>  | 2.55          | -0.56         | 0.33         | 0.40  |
| OmyOSU634                                               | TC162804             | CD209-like protein (Q64HY2; <i>O. mykiss</i> )                                    | <i>cd209</i>  | 0.09                                                                           | 0.67          | -0.12         | <b>1.12*</b>  | 0.67          | 0.46          | 0.34         | 0.07  |
| OmyOSU15                                                | BX311693             | Complement component C3-3 (Q98977; <i>O. mykiss</i> )                             | <i>c3-3</i>   | 0.20                                                                           | -0.06         | <b>-1.24*</b> | <b>-2.39*</b> | -0.94         | -0.15         | -0.07        | -0.81 |
| OmyOSU44                                                | BX306395             | Complement component C3-4 (Q9DDV9; <i>O. mykiss</i> )                             | <i>c3-4</i>   | 0.08                                                                           | -0.10         | <b>-1.39*</b> | <b>-2.60*</b> | -0.92         | 0.08          | -0.18        | -0.84 |
| OmyOSU411                                               | BX882784             | Complement C9 (Q4QZ25; <i>O. mykiss</i> )                                         | <i>c9</i>     | 0.14                                                                           | -0.13         | -0.39         | <b>-1.18*</b> | -0.20         | -0.08         | 0.09         | -0.10 |
| OmyOSU348                                               | TC149604             | CD59-like protein (B5X604; <i>S. salar</i> )                                      | <i>cd59</i>   | 0.41                                                                           | -0.14         | <b>-1.52*</b> | <b>-1.61*</b> | <b>-1.31*</b> | <b>-2.19*</b> | -0.11        | -0.94 |
| OmyOSU371                                               | TC159535             | C1q-like adipose specific protein (Q8JI26; <i>Salvelinus fontinalis</i> )         | <i>c1q</i>    | -0.18                                                                          | -0.29         | -1.54         | <b>-2.67*</b> | <b>-1.84*</b> | -0.04         | -0.25        | -0.97 |
| OmyOSU1147                                              | TC152823             | Pentraxin (P79899; <i>O. mykiss</i> ) <sup>c</sup>                                | <i>ptx</i>    | -0.08                                                                          | -0.41         | <b>-2.97*</b> | <b>-2.60*</b> | <b>-1.51*</b> | -0.32         | 0.01         | -0.13 |
| OmyOSU638                                               | TC137183             | C-type mannose-binding lectin (Q8JJ68; <i>O. mykiss</i> )                         | <i>mbl-1</i>  | -0.17                                                                          | -0.51         | <b>-1.21*</b> | <b>-1.49*</b> | <b>-1.56*</b> | -0.58         | -0.36        | -0.41 |
| OmyOSU636                                               | TC138355             | C-type MBL-2 protein (Q4LAN6; <i>O. mykiss</i> )                                  | <i>mbl</i>    | 0.23                                                                           | -0.54         | <b>-1.35*</b> | <b>-1.49*</b> | -1.68         | -0.88         | -0.21        | -0.16 |
| OmyOSU34                                                | TC141865             | C1 inhibitor (Q70W32; <i>O. mykiss</i> )                                          | <i>c1 inh</i> | 0.03                                                                           | -0.58         | -0.55         | <b>-1.33*</b> | -0.42         | 0.34          | -0.13        | 0.11  |
| OmyOSU76                                                | TC132971             | Complement receptor-like protein 1 (Q2PDG0; <i>O. mykiss</i> )                    | <i>crpl</i>   | -0.05                                                                          | -0.67         | -0.86         | <b>-1.21*</b> | -0.75         | -0.14         | -0.12        | 0.34  |
| OmyOSU1426                                              | TC142005             | Complement factor H protein (Q4QZ18; <i>O. mykiss</i> )                           | <i>cfh</i>    | 0.11                                                                           | -0.74         | -0.26         | <b>-1.09*</b> | -0.76         | 0.23          | -0.10        | 0.26  |
| OmyOSU1469                                              | TC167824             | Cathepsin S (C0HDJ6; <i>S. salar</i> )                                            | <i>cats</i>   | -0.09                                                                          | -0.96         | -1.87         | <b>-4.59*</b> | <b>-1.69*</b> | -0.08         | -0.48        | -0.03 |
| OmyOSU878                                               | CA383049             | Chemotaxin (Q9DFJ1; <i>O. mykiss</i> )                                            | <i>ctx</i>    | -0.08                                                                          | <b>-1.16*</b> | <b>-2.04*</b> | <b>4.00*</b>  | -0.13         | -0.71         | 0.48         | 0.76  |
| OmyOSU866                                               | TC148069             | Hemagglutinin/amebocyte aggregation factor (B5XF94; <i>S. salar</i> )             | <i>haaf</i>   | 0.06                                                                           | <b>-1.31*</b> | <b>-2.00*</b> | <b>-1.87*</b> | -1.80         | -0.89         | -0.41        | -1.62 |
| OmyOSU1                                                 | CA347121             | CD80-like protein (A11MH7; <i>O. mykiss</i> )                                     | <i>cd80</i>   | -0.18                                                                          | -1.95         | <b>-1.73*</b> | <b>-3.75*</b> | <b>-2.37*</b> | -0.35         | -0.45        | -0.71 |
| OmyOSU1477                                              | TC139517             | Trout C-polysaccharide binding protein 1 (Q9DFE5; <i>O. mykiss</i> ) <sup>c</sup> | <i>tcpbp</i>  | 0.55                                                                           | <b>-2.11*</b> | <b>-2.60*</b> | <b>-3.66*</b> | <b>-2.48*</b> | 0.36          | -0.69        | 0.21  |



**Supplemental Table 5. Select genes differentially regulated by experimental diets in trout liver.**

| Array ID                                               | DFCI ID <sup>a</sup> | Gene name (accession number; species)                                    | Symbol          | Mean log <sub>2</sub> fold-change in gene expression by treatment <sup>b</sup> |               |               |               |               |              |              |       |
|--------------------------------------------------------|----------------------|--------------------------------------------------------------------------|-----------------|--------------------------------------------------------------------------------|---------------|---------------|---------------|---------------|--------------|--------------|-------|
|                                                        |                      |                                                                          |                 | CON                                                                            | E2            | PFOA          | PFNA          | PFDA          | PFOS         | FTOH         | CLOF  |
| <b>Blood factors and coagulation</b>                   |                      |                                                                          |                 |                                                                                |               |               |               |               |              |              |       |
| OmyOSU723                                              | TC138894             | Plasminogen (Q5DVP8; <i>O. mykiss</i> )                                  | <i>plg</i>      | 0.04                                                                           | -0.34         | -0.16         | <b>-1.05*</b> | -0.50         | 0.44         | -0.23        | -0.06 |
| OmyOSU90                                               | TC157215             | Beta-2-glycoprotein 1 (C0H7U1; <i>S. salar</i> )                         | <i>apoh</i>     | 0.03                                                                           | -0.57         | -0.70         | <b>-1.11*</b> | -0.66         | -0.09        | -0.18        | -0.30 |
| OmyOSU649                                              | TC145770             | Coagulation factor VIII (Q804W6; <i>Takifugu rubripes</i> ) <sup>c</sup> | <i>f8</i>       | 0.11                                                                           | -0.62         | -0.44         | <b>-1.71*</b> | -0.93         | -0.02        | -0.25        | 0.17  |
| OmyOSU665                                              | TC149137             | Alpha-globin I (Q98973; <i>O. mykiss</i> )                               | <i>hbaa1</i>    | 0.07                                                                           | -0.65         | -0.86         | <b>-1.72*</b> | -0.59         | -0.94        | -0.20        | -0.27 |
| OmyOSU775                                              | TC139629             | Protein C (Q7T3B6; <i>D. rerio</i> )                                     | <i>proc</i>     | -0.25                                                                          | -0.68         | -0.23         | <b>-1.07*</b> | -0.51         | 0.41         | -0.31        | -0.19 |
| OmyOSU1338                                             | TC143725             | Antithrombin (Q9PTA8; <i>S. salar</i> ) <sup>c</sup>                     | <i>at</i>       | 0.12                                                                           | -0.70         | -0.52         | <b>-1.25*</b> | -0.78         | 0.37         | -0.29        | -0.09 |
| OmyOSU667                                              | CU064560             | Hemoglobin subunit alpha-1 (Q98974; <i>O. mykiss</i> )                   | <i>hba1</i>     | 0.26                                                                           | -0.72         | <b>-1.32*</b> | <b>-2.74*</b> | <b>-1.72*</b> | -1.08        | 0.09         | -0.23 |
| OmyOSU219                                              | TC135277             | Complement factor Bf-1 (Q9YGE7; <i>O. mykiss</i> )                       | <i>cfb1</i>     | -0.15                                                                          | -0.72         | <b>-1.21*</b> | <b>-1.85*</b> | <b>-1.24*</b> | 0.20         | -0.22        | -0.03 |
| OmyOSU355                                              | TC172297             | Serum albumin 1 (P21848; <i>S. salar</i> ) <sup>c</sup>                  | <i>alb1</i>     | 0.06                                                                           | -0.76         | -0.71         | <b>-3.48*</b> | <b>-1.86*</b> | -0.07        | -0.24        | 0.00  |
| OmyOSU677                                              | TC151435             | Fibrinogen (Q9DFD8; <i>O. mykiss</i> )                                   | <i>fgg</i>      | 0.16                                                                           | <b>-1.07*</b> | <b>-1.08*</b> | -0.49         | <b>-1.10*</b> | -0.14        | -0.26        | -0.16 |
| OmyOSU8                                                | TC164674             | Alpha 2 macroglobulin (C1K6P9; <i>Perca flavescens</i> ) <sup>c</sup>    | <i>a2m</i>      | 0.13                                                                           | -1.19         | <b>-1.10*</b> | <b>-2.67*</b> | <b>-1.30*</b> | 0.05         | -0.22        | -0.42 |
| OmyOSU1502                                             | TC132862             | Tissue factor (Q90W13; <i>O. mykiss</i> )                                | <i>f3a</i>      | 0.68                                                                           | -1.49         | -1.14         | <b>-2.26*</b> | <b>-1.75*</b> | 0.17         | -0.59        | 0.03  |
| <b>Lipid and cholesterol, metabolism and transport</b> |                      |                                                                          |                 |                                                                                |               |               |               |               |              |              |       |
| OmyOSU449                                              | TC151125             | Apolipoprotein B (C3UZW7; <i>P. flavescens</i> )                         | <i>apob</i>     | 0.03                                                                           | <b>1.17*</b>  | -0.21         | 0.27          | 0.60          | 0.55         | 0.33         | -0.26 |
| OmyOSU721                                              | TC145590             | Fatty acid binding protein, heart (O13008; <i>O. mykiss</i> )            | <i>fabp3</i>    | 0.09                                                                           | <b>1.07*</b>  | <b>1.50*</b>  | 0.40          | <b>1.21*</b>  | 0.45         | 0.23         | 0.88  |
| OmyOSU153                                              | TC162807             | Fatty acid binding protein (Q9DFE6; <i>O. mykiss</i> )                   | <i>fabp</i>     | 0.27                                                                           | 0.88          | <b>2.53*</b>  | <b>4.83*</b>  | <b>3.57*</b>  | -1.02        | -0.48        | 0.35  |
| OmyOSU904                                              | TC132457             | Lipoprotein lipase (Q9W6Y2; <i>O. mykiss</i> )                           | <i>lpl</i>      | 0.00                                                                           | -0.77         | -0.57         | <b>-1.24*</b> | -0.87         | 0.00         | -0.26        | -0.27 |
| OmyOSU908                                              | TC148996             | Epidermis-type lipoxigenase 3 (B5X0R4; <i>S. salar</i> )                 | <i>loxe3</i>    | 0.04                                                                           | -0.82         | <b>-1.08*</b> | <b>-2.11*</b> | <b>-1.36*</b> | -0.12        | -0.29        | -0.40 |
| OmyOSU453                                              | BX073289             | Apolipoprotein A-I-1 (O57523; <i>O. mykiss</i> )                         | <i>apo-AI-1</i> | -0.09                                                                          | <b>-1.05*</b> | <b>-1.37*</b> | -0.83         | -1.01         | -0.02        | -0.42        | -0.05 |
| OmyOSU1652                                             | TC161762             | Apolipoprotein E (Q9PT02; <i>O. mykiss</i> ) <sup>c</sup>                | <i>apoE</i>     | -0.17                                                                          | -1.36         | <b>-1.61*</b> | 0.00          | <b>-1.43*</b> | 0.11         | -0.46        | -0.40 |
| <b>Ion binding and transport</b>                       |                      |                                                                          |                 |                                                                                |               |               |               |               |              |              |       |
| OmyOSU1020                                             | TC165296             | Metallothionein B (P68501; <i>O. mykiss</i> ) <sup>c</sup>               | <i>mt-b</i>     | -0.32                                                                          | <b>1.18*</b>  | <b>1.23*</b>  | <b>3.29*</b>  | <b>1.34*</b>  | 0.88         | <b>1.33*</b> | 0.82  |
| OmyOSU846                                              | TC147024             | Transferrin (Q9PT13; <i>O. mykiss</i> ) <sup>c</sup>                     | <i>tf</i>       | 0.05                                                                           | -0.23         | -0.98         | <b>-2.72*</b> | -0.61         | 0.23         | 0.09         | 0.25  |
| OmyOSU657                                              | TC169785             | Haptoglobin 1 (Q9DFG1; <i>O. mykiss</i> ) <sup>c</sup>                   | <i>hp1</i>      | -0.15                                                                          | -0.41         | -0.82         | <b>-1.60*</b> | -0.04         | -0.04        | 0.06         | -0.20 |
| OmyOSU685                                              | BX073517             | Ferritin (P79823; <i>O. mykiss</i> ) <sup>c</sup>                        | <i>ft</i>       | -0.29                                                                          | <b>-1.20*</b> | <b>-1.78*</b> | <b>-1.11*</b> | <b>-1.56*</b> | -0.96        | -0.22        | -0.31 |
| OmyOSU699                                              | TC169206             | Hemopexin (P79825; <i>O. mykiss</i> )                                    | <i>hpx</i>      | -0.24                                                                          | <b>-1.99*</b> | <b>-2.08*</b> | <b>-3.28*</b> | <b>-2.50*</b> | -0.57        | -0.78        | -0.90 |
| <b>Glycolysis and carbohydrate metabolism</b>          |                      |                                                                          |                 |                                                                                |               |               |               |               |              |              |       |
| OmyOSU1241                                             | TC152596             | 6-Phosphofructokinase type C (C0HAA0; <i>S. salar</i> )                  | <i>k6pp</i>     | -0.09                                                                          | <b>2.43*</b>  | 0.91          | <b>1.72*</b>  | 1.69          | -0.25        | -0.05        | -0.02 |
| OmyOSU875                                              | CU072064             | Glucokinase (O93314; <i>O. mykiss</i> )                                  | <i>gk</i>       | -0.27                                                                          | <b>2.32*</b>  | 1.10          | 0.98          | -0.81         | <b>2.30*</b> | -0.30        | -0.10 |
| OmyOSU1149                                             | TC132998             | Phosphoenolpyruvate carboxykinase (Q98T97; <i>O. mykiss</i> )            | <i>pck</i>      | 0.04                                                                           | -0.12         | -0.68         | <b>-1.30*</b> | -0.63         | 0.33         | 0.18         | 0.05  |
| OmyOSU116                                              | TC150193             | Phosphorylase (C0PUK4; <i>S. salar</i> )                                 | <i>pygm</i>     | 0.31                                                                           | -0.75         | -0.75         | <b>-1.69*</b> | -0.76         | 0.35         | -0.04        | -0.05 |

**Supplemental Table 5. Select genes differentially regulated by experimental diets in trout liver.**

| Array ID                     | DFCI ID <sup>a</sup> | Gene name (accession number; species)                               | Symbol       | Mean log <sub>2</sub> fold-change in gene expression by treatment <sup>b</sup> |              |              |              |              |             |             |       |  |
|------------------------------|----------------------|---------------------------------------------------------------------|--------------|--------------------------------------------------------------------------------|--------------|--------------|--------------|--------------|-------------|-------------|-------|--|
|                              |                      |                                                                     |              | CON                                                                            | E2           | PFOA         | PFNA         | PFDA         | PFOS        | FTOH        | CLOF  |  |
| <b>Nucleoside Metabolism</b> |                      |                                                                     |              |                                                                                |              |              |              |              |             |             |       |  |
| OmyOSU252                    | TC152774             | Hypoxanthine phosphoribosyltransferase 1 (Q7ZV49; <i>D. rerio</i> ) | <i>hprt1</i> | 0.28                                                                           | <b>2.50</b>  | 2.04         | <b>2.22</b>  | <b>2.45</b>  | <b>1.16</b> | 0.43        | 0.20  |  |
| OmyOSU1518                   | TC171662             | Uridine phosphorylase (B5X227; <i>S. salar</i> )                    | <i>upp1</i>  | -0.04                                                                          | <b>2.53</b>  | <b>2.32</b>  | <b>2.23</b>  | <b>2.08</b>  | <b>1.01</b> | <b>1.08</b> | 0.03  |  |
| <b>Miscellaneous</b>         |                      |                                                                     |              |                                                                                |              |              |              |              |             |             |       |  |
| OmyOSU343                    | TC141079             | Biotinidase (Q8AV84; <i>T. rubripes</i> )                           | <i>btd</i>   | -0.13                                                                          | <b>-2.41</b> | <b>-2.57</b> | <b>-3.58</b> | <b>-2.44</b> | -0.72       | -0.24       | -0.04 |  |

<sup>a</sup> Manual array feature annotation was performed by querying the DFCI R.trout Gene Index (<http://compbio.dfci.harvard.edu/tgi/>) for the closest EST match to the array 70-mer sequence. Matching EST sequences were then BLASTX queried in the NCBI genome database. The top hit (lowest E-score) was selected as the matching gene. If an EST had no significant (E-value <10<sup>-6</sup>) BLASTX hit, then the most significant BLASTN hit is shown.

<sup>b</sup> Log<sub>2</sub> geometric mean fold change values are shown (N = 3) and represent background corrected, ratio-centered and Lowess-normalized signal ratios. Values in bold and marked with an asterisk are considered statistically significant (P ≤ 0.05 by Welch's t-test) and passed all stringency criteria. Color scales are provided to indicate visually the similarities or differences in gene expression among treatment groups (red, induced; green, repressed; white, no change).

<sup>c</sup> Unique array features targeted the same gene in some cases, though a single representative array feature is shown in this table.

**Supplemental Table 6. Pearson correlation coefficients (*r*) for pair-wise comparisons by treatment group.**

|                                                   | <b>PFOA</b> | <b>PFNA</b> | <b>PFDA</b> | <b>PFOS</b> | <b>FtOH</b> | <b>CLOF</b> |
|---------------------------------------------------|-------------|-------------|-------------|-------------|-------------|-------------|
| <i>Differentially regulated genes<sup>a</sup></i> |             |             |             |             |             |             |
| E2                                                | 0.93        | 0.84        | 0.93        | 0.78        | 0.83        | 0.30        |
| PFOA                                              |             | 0.86        | 0.95        | 0.82        | 0.82        | 0.39        |
| PFNA                                              |             |             | 0.91        | 0.66        | 0.73        | 0.45        |
| PFDA                                              |             |             |             | 0.78        | 0.83        | 0.41        |
| PFOS                                              |             |             |             |             | 0.83        | 0.42        |
| 8:2FtOH                                           |             |             |             |             |             | 0.30        |
| <i>All array features</i>                         |             |             |             |             |             |             |
| E2                                                | 0.85        | 0.75        | 0.83        | 0.61        | 0.50        | 0.25        |
| PFOA                                              |             | 0.73        | 0.83        | 0.62        | 0.68        | 0.27        |
| PFNA                                              |             |             | 0.83        | 0.53        | 0.61        | 0.40        |
| PFDA                                              |             |             |             | 0.63        | 0.74        | 0.38        |
| PFOS                                              |             |             |             |             | 0.70        | 0.46        |
| 8:2FtOH                                           |             |             |             |             |             | 0.35        |

<sup>a</sup> Correlation analysis were performed using a data subset including OSUrbt array features that were determined to be significantly differentially regulated in any one of the experimental treatments.

**Suppl. Table 7. Over-represented Gene Ontology biological process annotations associated with genes induced by the indicated dietary treatments<sup>a</sup>**

| # <sup>b</sup> | Accession  | Biological Process                                | E2    |              | PFOA  |                  | PFNA  |              | PFDA  |                  | PFOS  |                  | 8:2FtOH |                  | CLOF   |       |
|----------------|------------|---------------------------------------------------|-------|--------------|-------|------------------|-------|--------------|-------|------------------|-------|------------------|---------|------------------|--------|-------|
|                |            |                                                   | E     | FDR          | E     | FDR              | E     | FDR          | E     | FDR              | E     | FDR              | E       | FDR              | E      | FDR   |
| 1              | GO:0032355 | response to estradiol stimulus                    | 178.6 | <b>0.030</b> | 202.4 | <b>&lt;0.001</b> | 86.7  | <b>0.040</b> | 151.8 | <b>&lt;0.001</b> | 189.8 | <b>0.040</b>     | 303.6   | <b>&lt;0.001</b> | 1518.0 | 0.210 |
| 2              | GO:0030520 | estrogen receptor signaling pathway               | 259.8 | <b>0.020</b> | 294.4 | <b>&lt;0.001</b> | 126.2 | <b>0.030</b> | 220.8 | <b>&lt;0.001</b> | 276.0 | <b>&lt;0.001</b> | 441.6   | <b>&lt;0.001</b> | 2208.0 | 0.220 |
| 3              | GO:0006914 | autophagy                                         | 75.2  | 0.080        | 85.2  | <b>0.027</b>     | 36.5  | 0.073        | 63.9  | <b>0.048</b>     | 39.9  | 0.165            | 0.0     | 0.996            | 0.0    | 0.982 |
| 4              | GO:0046651 | lymphocyte proliferation                          | 14.9  | 0.352        | 0.0   | 0.976            | 21.7  | <b>0.040</b> | 12.7  | 0.360            | 31.6  | 0.071            | 0.0     | 0.905            | 0.0    | 0.584 |
| 5              | GO:0070661 | leukocyte proliferation                           | 14.4  | 0.352        | 0.0   | 0.997            | 21.0  | <b>0.031</b> | 12.3  | 0.358            | 30.7  | 0.065            | 0.0     | 1.000            | 0.0    | 0.999 |
| 6              | GO:0032943 | mononuclear cell proliferation                    | 14.4  | 0.352        | 0.0   | 0.997            | 21.0  | <b>0.031</b> | 12.3  | 0.358            | 30.7  | 0.065            | 0.0     | 1.000            | 0.0    | 0.999 |
| 7              | GO:0032602 | chemokine production                              | 0.0   | 0.965        | 0.0   | 0.974            | 40.8  | 0.306        | 0.0   | 0.958            | 178.6 | <b>0.027</b>     | 0.0     | 0.988            | 0.0    | 0.985 |
| 8              | GO:0009719 | response to endogenous stimulus                   | 18.2  | 0.073        | 13.7  | 0.308            | 8.8   | 0.250        | 15.4  | 0.056            | 19.3  | <b>0.025</b>     | 20.6    | 0.455            | 102.9  | 0.503 |
| 9              | GO:0010033 | response to organic substance                     | 11.5  | 0.060        | 6.5   | 0.386            | 5.6   | 0.248        | 7.4   | 0.206            | 12.3  | <b>0.015</b>     | 9.8     | 0.656            | 49.1   | 0.528 |
| 10             | GO:0001816 | cytokine production                               | 7.9   | 0.379        | 8.9   | 0.481            | 7.7   | 0.309        | 6.7   | 0.399            | 25.2  | <b>0.020</b>     | 0.0     | 0.999            | 0.0    | 0.994 |
| 11             | GO:0001818 | negative regulation of cytokine production        | 47.6  | 0.325        | 54.0  | 0.377            | 23.1  | 0.338        | 40.5  | 0.291            | 101.2 | <b>0.020</b>     | 0.0     | 0.995            | 0.0    | 0.978 |
| 12             | GO:0030522 | intracellular receptor-mediated signaling pathway | 32.8  | 0.151        | 37.2  | 0.193            | 16.0  | 0.261        | 27.9  | 0.095            | 34.9  | 0.071            | 55.8    | <b>0.031</b>     | 279.2  | 0.362 |
| 13             | GO:0048545 | response to steroid hormone stimulus              | 37.6  | 0.068        | 42.6  | 0.069            | 18.3  | 0.254        | 32.0  | 0.105            | 39.9  | <b>0.039</b>     | 63.9    | <b>0.030</b>     | 319.6  | 0.382 |
| 14             | GO:0030518 | steroid hormone receptor signaling pathway        | 43.3  | 0.051        | 49.1  | <b>0.050</b>     | 21.0  | 0.188        | 36.8  | 0.051            | 46.0  | <b>0.033</b>     | 73.6    | <b>0.032</b>     | 368.0  | 0.375 |
| 15             | GO:0043627 | response to estrogen stimulus                     | 64.9  | 0.068        | 73.6  | <b>0.030</b>     | 31.5  | 0.090        | 55.2  | 0.051            | 69.0  | <b>0.027</b>     | 110.4   | <b>0.013</b>     | 552.0  | 0.390 |
| 16             | GO:0009410 | response to xenobiotic stimulus                   | 55.0  | 0.063        | 62.3  | <b>0.028</b>     | 26.7  | 0.110        | 46.7  | 0.063            | 58.4  | <b>0.026</b>     | 93.4    | <b>0.035</b>     | 467.1  | 0.363 |

<sup>a</sup>Gene ontology enrichment analysis was performed using High Throughput GoMiner. A significant enrichment of the GO term category was inferred when  $p < 0.05$  as determined by a one-sided Fisher's exact test after false discovery rate (FDR) correction. Significantly enriched GO terms are indicated in bold with yellow or orange highlight.

<sup>b</sup>Number (#) corresponds to position in Cluster Image Map presented in Figure 4.

Abbreviations: E, enrichment value; FDR, false discovery rate-corrected  $p$ -value.

**Suppl. Table 8. Over-represented Gene Ontology biological process annotations associated with genes repressed by the indicated dietary treatments<sup>a</sup>**

| # <sup>b</sup> | Accession  | Biological Process                                                                                                                               | E2  |              | PFOA |              | PFNA |              | PFDA |              | PFOS |       | 8:2FtOH |       | CLOF |       |
|----------------|------------|--------------------------------------------------------------------------------------------------------------------------------------------------|-----|--------------|------|--------------|------|--------------|------|--------------|------|-------|---------|-------|------|-------|
|                |            |                                                                                                                                                  | E   | FDR          | E    | FDR          | E    | FDR          | E    | FDR          | E    | FDR   | E       | FDR   | E    | FDR   |
| 1              | GO:0002440 | production of molecular mediator of immune response                                                                                              | 32  | 0.236        | 55   | <b>0.007</b> | 25   | <b>0.020</b> | 55   | <b>0.008</b> | 0    | 1.000 | 0       | 0.998 | 0    | 1.000 |
| 2              | GO:0009967 | positive regulation of signal transduction                                                                                                       | 12  | 0.172        | 16   | <b>0.008</b> | 10   | <b>0.010</b> | 16   | <b>0.008</b> | 0    | 0.999 | 9       | 0.557 | 0    | 1.000 |
| 3              | GO:0010647 | positive regulation of cell communication                                                                                                        | 12  | 0.173        | 15   | <b>0.009</b> | 9    | <b>0.012</b> | 15   | <b>0.010</b> | 0    | 1.000 | 8       | 0.548 | 0    | 1.000 |
| 4              | GO:0031347 | regulation of defense response                                                                                                                   | 30  | 0.056        | 40   | <b>0.002</b> | 18   | <b>0.008</b> | 40   | <b>0.002</b> | 0    | 0.999 | 0       | 0.995 | 0    | 1.000 |
| 5              | GO:0002700 | regulation of production of molecular mediator of immune response                                                                                | 51  | 0.205        | 89   | <b>0.006</b> | 41   | <b>0.012</b> | 89   | <b>0.004</b> | 0    | 1.001 | 0       | 0.981 | 0    | 1.000 |
| 6              | GO:0032623 | interleukin-2 production                                                                                                                         | 58  | 0.199        | 101  | <b>0.005</b> | 46   | <b>0.012</b> | 101  | <b>0.004</b> | 0    | 0.996 | 0       | 0.992 | 0    | 1.000 |
| 7              | GO:0010033 | response to organic substance                                                                                                                    | 7   | 0.239        | 12   | <b>0.006</b> | 7    | <b>0.009</b> | 12   | <b>0.005</b> | 0    | 0.999 | 10      | 0.456 | 0    | 1.000 |
| 8              | GO:0032663 | regulation of interleukin-2 production                                                                                                           | 64  | 0.186        | 112  | <b>0.004</b> | 51   | <b>0.009</b> | 112  | <b>0.003</b> | 0    | 1.000 | 0       | 0.994 | 0    | 1.000 |
| 9              | GO:0048583 | regulation of response to stimulus                                                                                                               | 13  | <b>0.047</b> | 23   | <b>0.000</b> | 16   | <b>0.000</b> | 23   | <b>0.000</b> | 0    | 0.999 | 0       | 0.992 | 0    | 1.000 |
| 10             | GO:0002526 | acute inflammatory response                                                                                                                      | 36  | <b>0.046</b> | 47   | <b>0.001</b> | 43   | <b>0.000</b> | 47   | <b>0.002</b> | 0    | 0.965 | 0       | 0.769 | 0    | 1.000 |
| 11             | GO:0002250 | adaptive immune response                                                                                                                         | 32  | <b>0.045</b> | 43   | <b>0.002</b> | 26   | <b>0.000</b> | 43   | <b>0.002</b> | 0    | 1.000 | 0       | 0.995 | 0    | 1.000 |
| 12             | GO:0002460 | adaptive immune response based on somatic recombination of immune receptors built from immunoglobulin superfamily domains                        | 33  | <b>0.046</b> | 43   | <b>0.002</b> | 26   | <b>0.000</b> | 43   | <b>0.002</b> | 0    | 1.000 | 0       | 1.000 | 0    | 1.000 |
| 13             | GO:0002702 | positive regulation of production of molecular mediator of immune response                                                                       | 173 | 0.130        | 304  | <b>0.001</b> | 139  | <b>0.002</b> | 304  | <b>0.003</b> | 0    | 0.985 | 0       | 0.971 | 0    | 1.000 |
| 14             | GO:0048584 | positive regulation of response to stimulus                                                                                                      | 16  | 0.132        | 29   | <b>0.001</b> | 20   | <b>0.000</b> | 29   | <b>0.003</b> | 0    | 1.000 | 0       | 0.973 | 0    | 1.000 |
| 15             | GO:0002253 | activation of immune response                                                                                                                    | 18  | 0.296        | 48   | <b>0.001</b> | 37   | <b>0.000</b> | 48   | <b>0.002</b> | 0    | 1.000 | 0       | 0.997 | 0    | 1.000 |
| 16             | GO:0050778 | positive regulation of immune response                                                                                                           | 28  | 0.070        | 48   | <b>0.000</b> | 33   | <b>0.000</b> | 48   | <b>0.002</b> | 0    | 0.976 | 0       | 0.834 | 0    | 1.000 |
| 17             | GO:0002252 | immune effector process                                                                                                                          | 19  | 0.112        | 33   | <b>0.000</b> | 22   | <b>0.000</b> | 33   | <b>0.002</b> | 0    | 1.000 | 0       | 0.980 | 0    | 1.000 |
| 18             | GO:0045087 | innate immune response                                                                                                                           | 18  | 0.112        | 24   | <b>0.006</b> | 18   | <b>0.000</b> | 24   | <b>0.004</b> | 0    | 1.000 | 0       | 0.998 | 0    | 1.000 |
| 19             | GO:0002699 | positive regulation of immune effector process                                                                                                   | 53  | 0.205        | 92   | <b>0.006</b> | 63   | <b>0.000</b> | 92   | <b>0.004</b> | 0    | 1.000 | 0       | 0.995 | 0    | 1.000 |
| 20             | GO:0002824 | positive regulation of adaptive immune response based on somatic recombination of immune receptors built from immunoglobulin superfamily domains | 75  | 0.176        | 132  | <b>0.004</b> | 91   | <b>0.000</b> | 132  | <b>0.004</b> | 0    | 1.000 | 0       | 0.990 | 0    | 1.000 |
| 21             | GO:0002705 | positive regulation of leukocyte mediated immunity                                                                                               | 67  | 0.185        | 117  | <b>0.004</b> | 80   | <b>0.000</b> | 117  | <b>0.003</b> | 0    | 1.000 | 0       | 1.000 | 0    | 1.000 |
| 22             | GO:0002708 | positive regulation of lymphocyte mediated immunity                                                                                              | 67  | 0.185        | 117  | <b>0.004</b> | 80   | <b>0.000</b> | 117  | <b>0.003</b> | 0    | 1.000 | 0       | 1.000 | 0    | 1.000 |
| 23             | GO:0006954 | inflammatory response                                                                                                                            | 10  | 0.198        | 17   | <b>0.003</b> | 13   | <b>0.000</b> | 21   | <b>0.003</b> | 0    | 1.000 | 0       | 0.998 | 0    | 1.000 |
| 24             | GO:0002821 | positive regulation of adaptive immune response                                                                                                  | 72  | 0.180        | 127  | <b>0.004</b> | 87   | <b>0.000</b> | 127  | <b>0.004</b> | 0    | 0.995 | 0       | 0.990 | 0    | 1.000 |
| 25             | GO:0051605 | protein maturation by peptide bond cleavage                                                                                                      | 23  | 0.273        | 40   | <b>0.010</b> | 37   | <b>0.000</b> | 40   | <b>0.011</b> | 0    | 1.000 | 0       | 0.999 | 0    | 1.000 |
| 26             | GO:0002703 | regulation of leukocyte mediated immunity                                                                                                        | 36  | 0.223        | 63   | <b>0.007</b> | 43   | <b>0.001</b> | 63   | <b>0.007</b> | 0    | 1.000 | 0       | 0.998 | 0    | 1.000 |

**Suppl. Table 8. Over-represented Gene Ontology biological process annotations associated with genes repressed by the indicated dietary treatments<sup>a</sup>**

| # <sup>b</sup> | Accession  | Biological Process                                                                                                                      | E2  |              | PFOA |              | PFNA |              | PFDA |              | PFOS |       | 8:2FtOH |       | CLOF |       |
|----------------|------------|-----------------------------------------------------------------------------------------------------------------------------------------|-----|--------------|------|--------------|------|--------------|------|--------------|------|-------|---------|-------|------|-------|
|                |            |                                                                                                                                         | E   | FDR          | E    | FDR          | E    | FDR          | E    | FDR          | E    | FDR   | E       | FDR   | E    | FDR   |
| 27             | GO:0006956 | complement activation                                                                                                                   | 39  | 0.219        | 69   | <b>0.006</b> | 63   | <b>0.000</b> | 69   | <b>0.007</b> | 0    | 1.000 | 0       | 0.973 | 0    | 1.000 |
| 28             | GO:0002706 | regulation of lymphocyte mediated immunity                                                                                              | 39  | 0.219        | 69   | <b>0.006</b> | 47   | <b>0.000</b> | 69   | <b>0.007</b> | 0    | 1.000 | 0       | 0.973 | 0    | 1.000 |
| 29             | GO:0002541 | activation of plasma proteins involved in acute inflammatory response                                                                   | 36  | 0.223        | 63   | <b>0.007</b> | 58   | <b>0.000</b> | 63   | <b>0.007</b> | 0    | 1.000 | 0       | 0.998 | 0    | 1.000 |
| 30             | GO:0080134 | regulation of response to stress                                                                                                        | 0   | 0.969        | 20   | <b>0.007</b> | 15   | <b>0.000</b> | 20   | <b>0.007</b> | 0    | 0.999 | 0       | 0.936 | 0    | 1.000 |
| 31             | GO:0006826 | iron ion transport                                                                                                                      | 72  | <b>0.009</b> | 63   | <b>0.007</b> | 29   | <b>0.018</b> | 63   | <b>0.007</b> | 0    | 1.000 | 0       | 0.998 | 0    | 1.000 |
| 32             | GO:0045088 | regulation of innate immune response                                                                                                    | 89  | <b>0.007</b> | 78   | <b>0.006</b> | 36   | <b>0.015</b> | 78   | <b>0.006</b> | 0    | 1.000 | 0       | 1.000 | 0    | 1.000 |
| 33             | GO:0050731 | positive regulation of peptidyl-tyrosine phosphorylation                                                                                | 81  | <b>0.009</b> | 71   | <b>0.006</b> | 32   | <b>0.015</b> | 71   | <b>0.007</b> | 0    | 0.999 | 0       | 0.997 | 0    | 1.000 |
| 34             | GO:0002682 | regulation of immune system process                                                                                                     | 15  | <b>0.018</b> | 21   | <b>0.000</b> | 16   | <b>0.000</b> | 21   | <b>0.004</b> | 0    | 0.999 | 0       | 0.986 | 0    | 1.000 |
| 35             | GO:0002697 | regulation of immune effector process                                                                                                   | 42  | <b>0.018</b> | 56   | <b>0.001</b> | 34   | <b>0.000</b> | 56   | <b>0.002</b> | 0    | 1.000 | 0       | 1.000 | 0    | 1.000 |
| 36             | GO:0006959 | humoral immune response                                                                                                                 | 40  | <b>0.018</b> | 53   | <b>0.001</b> | 40   | <b>0.000</b> | 53   | <b>0.002</b> | 0    | 0.999 | 0       | 0.992 | 0    | 1.000 |
| 37             | GO:0000041 | transition metal ion transport                                                                                                          | 55  | <b>0.000</b> | 48   | <b>0.001</b> | 22   | <b>0.005</b> | 48   | <b>0.002</b> | 258  | 0.773 | 0       | 0.997 | 0    | 1.000 |
| 38             | GO:0030005 | cellular di- tri-valent inorganic cation homeostasis                                                                                    | 29  | <b>0.000</b> | 32   | <b>0.000</b> | 15   | <b>0.000</b> | 32   | <b>0.000</b> | 103  | 0.811 | 0       | 0.990 | 0    | 1.000 |
| 39             | GO:0006879 | cellular iron ion homeostasis                                                                                                           | 122 | <b>0.000</b> | 107  | <b>0.000</b> | 49   | <b>0.000</b> | 107  | <b>0.000</b> | 426  | 1.127 | 0       | 0.922 | 0    | 1.000 |
| 40             | GO:0055072 | iron ion homeostasis                                                                                                                    | 0   | 0.976        | 100  | <b>0.000</b> | 46   | <b>0.000</b> | 100  | <b>0.000</b> | 398  | 0.880 | 0       | 0.995 | 0    | 1.000 |
| 41             | GO:0002920 | regulation of humoral immune response                                                                                                   | 434 | <b>0.000</b> | 380  | <b>0.001</b> | 173  | <b>0.001</b> | 380  | <b>0.003</b> | 0    | 1.000 | 0       | 0.980 | 0    | 1.000 |
| 42             | GO:0055080 | cation homeostasis                                                                                                                      | 0   | 0.965        | 25   | <b>0.000</b> | 12   | <b>0.001</b> | 25   | <b>0.002</b> | 81   | 0.637 | 0       | 0.974 | 0    | 1.000 |
| 43             | GO:0055066 | di- tri-valent inorganic cation homeostasis                                                                                             | 0   | 0.997        | 31   | <b>0.000</b> | 14   | <b>0.000</b> | 31   | <b>0.003</b> | 99   | 0.732 | 0       | 0.993 | 0    | 1.000 |
| 44             | GO:0030003 | cellular cation homeostasis                                                                                                             | 27  | <b>0.000</b> | 29   | <b>0.000</b> | 13   | <b>0.000</b> | 29   | <b>0.003</b> | 93   | 0.676 | 0       | 0.986 | 0    | 1.000 |
| 45             | GO:0050801 | ion homeostasis                                                                                                                         | 17  | <b>0.005</b> | 18   | <b>0.000</b> | 8    | <b>0.004</b> | 18   | <b>0.002</b> | 58   | 0.591 | 0       | 0.995 | 0    | 1.000 |
| 46             | GO:0006873 | cellular ion homeostasis                                                                                                                | 19  | <b>0.007</b> | 20   | <b>0.000</b> | 9    | <b>0.003</b> | 20   | <b>0.003</b> | 65   | 0.666 | 0       | 0.986 | 0    | 1.000 |
| 47             | GO:0055082 | cellular chemical homeostasis                                                                                                           | 0   | 0.701        | 20   | <b>0.000</b> | 9    | <b>0.003</b> | 20   | <b>0.003</b> | 63   | 0.624 | 0       | 0.968 | 0    | 1.000 |
| 48             | GO:0002684 | positive regulation of immune system process                                                                                            | 25  | <b>0.008</b> | 37   | <b>0.000</b> | 24   | <b>0.000</b> | 37   | <b>0.000</b> | 0    | 0.972 | 0       | 0.810 | 0    | 1.000 |
| 49             | GO:0050776 | regulation of immune response                                                                                                           | 27  | <b>0.008</b> | 40   | <b>0.000</b> | 26   | <b>0.000</b> | 40   | <b>0.000</b> | 0    | 0.999 | 0       | 0.970 | 0    | 1.000 |
| 50             | GO:0002819 | regulation of adaptive immune response                                                                                                  | 77  | <b>0.009</b> | 101  | <b>0.000</b> | 62   | <b>0.000</b> | 101  | <b>0.003</b> | 0    | 0.995 | 0       | 0.783 | 0    | 1.000 |
| 51             | GO:0002822 | regulation of adaptive immune response based on somatic recombination of immune receptors built from immunoglobulin superfamily domains | 79  | <b>0.009</b> | 104  | <b>0.000</b> | 63   | <b>0.000</b> | 104  | <b>0.003</b> | 0    | 1.000 | 0       | 0.973 | 0    | 1.000 |
| 52             | GO:0001934 | positive regulation of protein amino acid phosphorylation                                                                               | 43  | <b>0.018</b> | 37   | <b>0.011</b> | 17   | 0.062        | 37   | <b>0.012</b> | 0    | 0.987 | 0       | 0.990 | 0    | 1.000 |
| 53             | GO:0050730 | regulation of peptidyl-tyrosine phosphorylation                                                                                         | 57  | <b>0.016</b> | 50   | <b>0.008</b> | 23   | <b>0.037</b> | 50   | <b>0.009</b> | 0    | 1.000 | 0       | 0.995 | 0    | 1.000 |
| 54             | GO:0031399 | regulation of protein modification process                                                                                              | 25  | <b>0.008</b> | 22   | <b>0.006</b> | 10   | <b>0.037</b> | 22   | <b>0.006</b> | 0    | 0.976 | 0       | 0.992 | 0    | 1.000 |

**Suppl. Table 8. Over-represented Gene Ontology biological process annotations associated with genes repressed by the indicated dietary treatments<sup>a</sup>**

| # <sup>b</sup> | Accession  | Biological Process                                             | E2 |       | PFOA |       | PFNA |              | PFDA |       | PFOS |       | 8:2FtOH |       | CLOF |       |
|----------------|------------|----------------------------------------------------------------|----|-------|------|-------|------|--------------|------|-------|------|-------|---------|-------|------|-------|
|                |            |                                                                | E  | FDR   | E    | FDR   | E    | FDR          | E    | FDR   | E    | FDR   | E       | FDR   | E    | FDR   |
| 55             | GO:0010627 | regulation of protein kinase cascade                           | 7  | 0.368 | 13   | 0.066 | 9    | <b>0.049</b> | 13   | 0.070 | 0    | 0.973 | 10      | 0.525 | 0    | 1.000 |
| 56             | GO:0002888 | positive regulation of myeloid leukocyte mediated immunity     | 0  | 0.992 | 0    | 0.981 | 347  | <b>0.036</b> | 0    | 0.983 | 0    | 1.000 | 0       | 0.993 | 0    | 1.000 |
| 57             | GO:0001796 | regulation of type IIa hypersensitivity                        | 0  | 0.992 | 0    | 0.981 | 347  | <b>0.036</b> | 0    | 0.983 | 0    | 1.000 | 0       | 0.993 | 0    | 1.000 |
| 58             | GO:0008065 | establishment of blood-nerve barrier                           | 0  | 0.992 | 0    | 0.981 | 347  | <b>0.036</b> | 0    | 0.983 | 0    | 1.000 | 0       | 0.993 | 0    | 1.000 |
| 59             | GO:0007597 | blood coagulation intrinsic pathway                            | 0  | 0.992 | 0    | 0.981 | 347  | <b>0.036</b> | 0    | 0.983 | 0    | 1.000 | 0       | 0.993 | 0    | 1.000 |
| 60             | GO:0002445 | type II hypersensitivity                                       | 0  | 0.992 | 0    | 0.981 | 347  | <b>0.036</b> | 0    | 0.983 | 0    | 1.000 | 0       | 0.993 | 0    | 1.000 |
| 61             | GO:0034392 | negative regulation of smooth muscle cell apoptosis            | 0  | 0.992 | 0    | 0.981 | 347  | <b>0.036</b> | 0    | 0.983 | 0    | 1.000 | 0       | 0.993 | 0    | 1.000 |
| 62             | GO:0002892 | regulation of type II hypersensitivity                         | 0  | 0.992 | 0    | 0.981 | 347  | <b>0.036</b> | 0    | 0.983 | 0    | 1.000 | 0       | 0.993 | 0    | 1.000 |
| 63             | GO:0002894 | positive regulation of type II hypersensitivity                | 0  | 0.992 | 0    | 0.981 | 347  | <b>0.036</b> | 0    | 0.983 | 0    | 1.000 | 0       | 0.993 | 0    | 1.000 |
| 64             | GO:0001794 | type IIa hypersensitivity                                      | 0  | 0.992 | 0    | 0.981 | 347  | <b>0.036</b> | 0    | 0.983 | 0    | 1.000 | 0       | 0.993 | 0    | 1.000 |
| 65             | GO:0001798 | positive regulation of type IIa hypersensitivity               | 0  | 0.992 | 0    | 0.981 | 347  | <b>0.036</b> | 0    | 0.983 | 0    | 1.000 | 0       | 0.993 | 0    | 1.000 |
| 66             | GO:0016064 | immunoglobulin mediated immune response                        | 26 | 0.257 | 23   | 0.112 | 21   | <b>0.038</b> | 23   | 0.118 | 0    | 0.999 | 0       | 0.997 | 0    | 1.000 |
| 67             | GO:0045765 | regulation of angiogenesis                                     | 0  | 0.947 | 0    | 0.789 | 22   | <b>0.037</b> | 0    | 0.797 | 0    | 1.000 | 0       | 0.997 | 0    | 1.000 |
| 68             | GO:0051271 | negative regulation of cell motion                             | 0  | 0.994 | 25   | 0.108 | 23   | <b>0.037</b> | 25   | 0.113 | 0    | 1.000 | 0       | 1.000 | 0    | 1.000 |
| 69             | GO:0051240 | positive regulation of multicellular organismal process        | 10 | 0.341 | 17   | 0.052 | 12   | <b>0.017</b> | 17   | 0.055 | 0    | 1.000 | 0       | 0.998 | 0    | 1.000 |
| 70             | GO:0010740 | positive regulation of protein kinase cascade                  | 11 | 0.336 | 19   | 0.050 | 13   | <b>0.015</b> | 19   | 0.052 | 0    | 0.997 | 0       | 0.834 | 0    | 1.000 |
| 71             | GO:0046486 | glycerolipid metabolic process                                 | 0  | 0.988 | 9    | 0.154 | 12   | <b>0.015</b> | 9    | 0.171 | 0    | 1.000 | 0       | 0.995 | 0    | 1.000 |
| 72             | GO:0050818 | regulation of coagulation                                      | 0  | 0.630 | 38   | 0.094 | 35   | <b>0.015</b> | 38   | 0.099 | 0    | 0.990 | 0       | 0.833 | 0    | 1.000 |
| 73             | GO:0043542 | endothelial cell migration                                     | 0  | 0.748 | 37   | 0.095 | 34   | <b>0.015</b> | 37   | 0.100 | 0    | 1.000 | 0       | 0.971 | 0    | 1.000 |
| 74             | GO:0006953 | acute-phase response                                           | 48 | 0.208 | 42   | 0.092 | 39   | <b>0.013</b> | 42   | 0.097 | 0    | 0.998 | 0       | 0.977 | 0    | 1.000 |
| 75             | GO:0050819 | negative regulation of coagulation                             | 0  | 0.968 | 47   | 0.088 | 43   | <b>0.012</b> | 47   | 0.094 | 0    | 0.998 | 0       | 0.990 | 0    | 1.000 |
| 76             | GO:0030193 | regulation of blood coagulation                                | 0  | 0.994 | 46   | 0.090 | 42   | <b>0.012</b> | 46   | 0.095 | 0    | 1.000 | 0       | 0.995 | 0    | 1.000 |
| 77             | GO:0002455 | humoral immune response mediated by circulating immunoglobulin | 53 | 0.205 | 46   | 0.090 | 42   | <b>0.012</b> | 46   | 0.095 | 0    | 1.000 | 0       | 0.995 | 0    | 1.000 |
| 78             | GO:0030336 | negative regulation of cell migration                          | 0  | 0.861 | 28   | 0.104 | 25   | <b>0.020</b> | 28   | 0.109 | 0    | 1.000 | 0       | 0.998 | 0    | 1.000 |
| 79             | GO:0042440 | pigment metabolic process                                      | 36 | 0.223 | 32   | 0.100 | 29   | <b>0.018</b> | 32   | 0.105 | 0    | 1.000 | 0       | 0.998 | 0    | 1.000 |
| 80             | GO:0016525 | negative regulation of angiogenesis                            | 0  | 0.920 | 0    | 0.986 | 56   | <b>0.009</b> | 0    | 0.987 | 0    | 0.996 | 0       | 0.998 | 0    | 1.000 |
| 81             | GO:0030195 | negative regulation of blood coagulation                       | 0  | 0.993 | 58   | 0.080 | 53   | <b>0.009</b> | 58   | 0.086 | 0    | 1.000 | 0       | 1.000 | 0    | 1.000 |
| 82             | GO:0010594 | regulation of endothelial cell migration                       | 0  | 0.973 | 69   | 0.074 | 63   | <b>0.007</b> | 69   | 0.080 | 0    | 0.995 | 0       | 0.983 | 0    | 1.000 |
| 83             | GO:0002889 | regulation of immunoglobulin mediated immune response          | 83 | 0.173 | 72   | 0.073 | 66   | <b>0.007</b> | 72   | 0.079 | 0    | 1.000 | 0       | 0.995 | 0    | 1.000 |

**Suppl. Table 8. Over-represented Gene Ontology biological process annotations associated with genes repressed by the indicated dietary treatments<sup>a</sup>**

| # <sup>b</sup> | Accession  | Biological Process                                             | E2  |       | PFOA |              | PFNA |              | PFDA |              | PFOS |       | 8:2FtOH |       | CLOF |       |
|----------------|------------|----------------------------------------------------------------|-----|-------|------|--------------|------|--------------|------|--------------|------|-------|---------|-------|------|-------|
|                |            |                                                                | E   | FDR   | E    | FDR          | E    | FDR          | E    | FDR          | E    | FDR   | E       | FDR   | E    | FDR   |
| 84             | GO:0002712 | regulation of B cell mediated immunity                         | 83  | 0.173 | 72   | 0.073        | 66   | <b>0.007</b> | 72   | 0.079        | 0    | 1.000 | 0       | 0.995 | 0    | 1.000 |
| 85             | GO:0010596 | negative regulation of endothelial cell migration              | 0   | 0.972 | 117  | 0.063        | 107  | <b>0.003</b> | 117  | 0.067        | 0    | 1.000 | 0       | 0.989 | 0    | 1.000 |
| 86             | GO:0042730 | fibrinolysis                                                   | 0   | 0.970 | 0    | 0.953        | 77   | <b>0.004</b> | 0    | 0.955        | 0    | 1.000 | 0       | 0.981 | 0    | 1.000 |
| 87             | GO:0042060 | wound healing                                                  | 8   | 0.359 | 14   | 0.061        | 13   | <b>0.003</b> | 14   | 0.065        | 0    | 1.000 | 0       | 0.973 | 0    | 1.000 |
| 88             | GO:0002673 | regulation of acute inflammatory response                      | 108 | 0.159 | 95   | 0.067        | 87   | <b>0.003</b> | 95   | 0.072        | 0    | 1.000 | 0       | 0.919 | 0    | 1.000 |
| 89             | GO:0020027 | hemoglobin metabolic process                                   | 108 | 0.159 | 95   | 0.067        | 87   | <b>0.003</b> | 95   | 0.072        | 0    | 1.000 | 0       | 0.919 | 0    | 1.000 |
| 90             | GO:0006957 | complement activation alternative pathway                      | 0   | 0.956 | 101  | 0.066        | 139  | <b>0.000</b> | 101  | 0.070        | 0    | 1.000 | 0       | 0.990 | 0    | 1.000 |
| 91             | GO:0051918 | negative regulation of fibrinolysis                            | 0   | 0.979 | 0    | 0.945        | 278  | <b>0.000</b> | 0    | 0.948        | 0    | 0.999 | 0       | 0.986 | 0    | 1.000 |
| 92             | GO:0006641 | triglyceride metabolic process                                 | 0   | 0.943 | 36   | 0.097        | 50   | <b>0.000</b> | 36   | 0.101        | 0    | 1.000 | 0       | 0.997 | 0    | 1.000 |
| 93             | GO:0051917 | regulation of fibrinolysis                                     | 0   | 0.733 | 0    | 0.547        | 154  | <b>0.002</b> | 0    | 0.563        | 0    | 0.999 | 0       | 0.903 | 0    | 1.000 |
| 94             | GO:0006639 | acylglycerol metabolic process                                 | 0   | 0.880 | 32   | 0.100        | 44   | <b>0.001</b> | 32   | 0.104        | 0    | 0.994 | 0       | 0.997 | 0    | 1.000 |
| 95             | GO:0018904 | organic ether metabolic process                                | 0   | 0.963 | 30   | 0.102        | 41   | <b>0.001</b> | 30   | 0.106        | 0    | 1.000 | 0       | 0.984 | 0    | 1.000 |
| 96             | GO:0006638 | neutral lipid metabolic process                                | 0   | 0.990 | 32   | 0.100        | 43   | <b>0.001</b> | 32   | 0.105        | 0    | 1.000 | 0       | 0.998 | 0    | 1.000 |
| 97             | GO:0006662 | glycerol ether metabolic process                               | 0   | 0.975 | 30   | 0.102        | 42   | <b>0.001</b> | 30   | 0.106        | 0    | 0.999 | 0       | 0.971 | 0    | 1.000 |
| 98             | GO:0050878 | regulation of body fluid levels                                | 11  | 0.335 | 19   | 0.050        | 17   | <b>0.002</b> | 19   | 0.052        | 0    | 0.996 | 0       | 0.837 | 0    | 1.000 |
| 99             | GO:0002714 | positive regulation of B cell mediated immunity                | 217 | 0.114 | 190  | 0.052        | 173  | <b>0.001</b> | 190  | 0.055        | 0    | 1.000 | 0       | 0.980 | 0    | 1.000 |
| 100            | GO:0002891 | positive regulation of immunoglobulin mediated immune response | 217 | 0.114 | 190  | 0.052        | 173  | <b>0.001</b> | 190  | 0.055        | 0    | 1.000 | 0       | 0.980 | 0    | 1.000 |
| 101            | GO:0007599 | hemostasis                                                     | 13  | 0.325 | 23   | <b>0.042</b> | 21   | <b>0.001</b> | 23   | <b>0.044</b> | 0    | 1.000 | 0       | 0.972 | 0    | 1.000 |
| 102            | GO:0032101 | regulation of response to external stimulus                    | 13  | 0.325 | 22   | <b>0.042</b> | 20   | <b>0.001</b> | 22   | <b>0.044</b> | 0    | 1.000 | 0       | 0.936 | 0    | 1.000 |
| 103            | GO:0050817 | coagulation                                                    | 13  | 0.325 | 22   | <b>0.042</b> | 20   | <b>0.001</b> | 22   | <b>0.044</b> | 0    | 1.000 | 0       | 0.936 | 0    | 1.000 |
| 104            | GO:0007596 | blood coagulation                                              | 13  | 0.325 | 23   | <b>0.038</b> | 21   | <b>0.000</b> | 23   | <b>0.040</b> | 0    | 1.000 | 0       | 1.000 | 0    | 1.000 |
| 105            | GO:0051604 | protein maturation                                             | 14  | 0.326 | 24   | <b>0.039</b> | 28   | <b>0.000</b> | 24   | <b>0.041</b> | 0    | 0.999 | 0       | 0.934 | 0    | 1.000 |
| 106            | GO:0002449 | lymphocyte mediated immunity                                   | 17  | 0.304 | 30   | <b>0.026</b> | 21   | <b>0.006</b> | 30   | <b>0.025</b> | 0    | 1.000 | 0       | 0.984 | 0    | 1.000 |
| 107            | GO:0016485 | protein processing                                             | 15  | 0.316 | 27   | <b>0.032</b> | 31   | <b>0.000</b> | 27   | <b>0.034</b> | 0    | 0.999 | 0       | 0.992 | 0    | 1.000 |
| 108            | GO:0002443 | leukocyte mediated immunity                                    | 15  | 0.318 | 26   | <b>0.032</b> | 18   | <b>0.009</b> | 26   | <b>0.034</b> | 0    | 0.951 | 0       | 0.937 | 0    | 1.000 |
| 109            | GO:0050727 | regulation of inflammatory response                            | 28  | 0.252 | 48   | <b>0.008</b> | 22   | <b>0.037</b> | 48   | <b>0.009</b> | 0    | 1.000 | 0       | 0.984 | 0    | 1.000 |
| 110            | GO:0030162 | regulation of proteolysis                                      | 35  | 0.225 | 62   | <b>0.007</b> | 14   | 0.213        | 62   | <b>0.007</b> | 0    | 0.989 | 0       | 0.994 | 0    | 1.000 |
| 111            | GO:0019220 | regulation of phosphate metabolic process                      | 8   | 0.224 | 14   | <b>0.005</b> | 5    | 0.142        | 14   | <b>0.004</b> | 0    | 0.998 | 0       | 0.991 | 0    | 1.000 |
| 112            | GO:0051174 | regulation of phosphorus metabolic process                     | 8   | 0.224 | 14   | <b>0.005</b> | 5    | 0.142        | 14   | <b>0.004</b> | 0    | 0.998 | 0       | 0.991 | 0    | 1.000 |



**Suppl. Table 8. Over-represented Gene Ontology biological process annotations associated with genes repressed by the indicated dietary treatments<sup>a</sup>**

| # <sup>b</sup> | Accession  | Biological Process                                                        | E2  |       | PFOA |              | PFNA |              | PFDA |              | PFOS |       | 8:2FtOH |       | CLOF |       |
|----------------|------------|---------------------------------------------------------------------------|-----|-------|------|--------------|------|--------------|------|--------------|------|-------|---------|-------|------|-------|
|                |            |                                                                           | E   | FDR   | E    | FDR          | E    | FDR          | E    | FDR          | E    | FDR   | E       | FDR   | E    | FDR   |
| 113            | GO:0051247 | positive regulation of protein metabolic process                          | 18  | 0.125 | 24   | <b>0.006</b> | 7    | 0.151        | 24   | <b>0.004</b> | 0    | 0.946 | 0       | 0.984 | 0    | 1.000 |
| 114            | GO:0032270 | positive regulation of cellular protein metabolic process                 | 19  | 0.113 | 25   | <b>0.005</b> | 8    | 0.147        | 25   | <b>0.004</b> | 0    | 1.000 | 0       | 0.996 | 0    | 1.000 |
| 115            | GO:0042325 | regulation of phosphorylation                                             | 8   | 0.220 | 14   | <b>0.004</b> | 5    | 0.135        | 14   | <b>0.003</b> | 0    | 0.998 | 0       | 0.986 | 0    | 1.000 |
| 116            | GO:0050865 | regulation of cell activation                                             | 11  | 0.330 | 30   | <b>0.003</b> | 9    | 0.123        | 30   | <b>0.003</b> | 0    | 1.000 | 0       | 0.999 | 0    | 1.000 |
| 117            | GO:0031348 | negative regulation of defense response                                   | 72  | 0.180 | 127  | <b>0.004</b> | 29   | 0.158        | 127  | <b>0.004</b> | 0    | 0.995 | 0       | 0.990 | 0    | 1.000 |
| 118            | GO:0050870 | positive regulation of T cell activation                                  | 26  | 0.259 | 45   | <b>0.009</b> | 20   | 0.050        | 45   | <b>0.010</b> | 0    | 1.000 | 0       | 0.986 | 0    | 1.000 |
| 119            | GO:0051251 | positive regulation of lymphocyte activation                              | 21  | 0.281 | 37   | <b>0.010</b> | 17   | 0.062        | 37   | <b>0.013</b> | 0    | 1.000 | 0       | 1.000 | 0    | 1.000 |
| 120            | GO:0042176 | regulation of protein catabolic process                                   | 24  | 0.265 | 43   | <b>0.009</b> | 10   | 0.243        | 43   | <b>0.011</b> | 0    | 0.999 | 0       | 0.992 | 0    | 1.000 |
| 121            | GO:0048585 | negative regulation of response to stimulus                               | 24  | 0.265 | 43   | <b>0.009</b> | 10   | 0.243        | 43   | <b>0.011</b> | 0    | 0.999 | 0       | 0.992 | 0    | 1.000 |
| 122            | GO:0001869 | negative regulation of complement activation lectin pathway               | 867 | 0.055 | 759  | <b>0.027</b> | 347  | <b>0.036</b> | 759  | <b>0.027</b> | 0    | 1.000 | 0       | 0.993 | 0    | 1.000 |
| 123            | GO:0015886 | heme transport                                                            | 867 | 0.055 | 759  | <b>0.027</b> | 347  | <b>0.036</b> | 759  | <b>0.027</b> | 0    | 1.000 | 0       | 0.993 | 0    | 1.000 |
| 124            | GO:0045627 | positive regulation of T-helper 1 cell differentiation                    | 867 | 0.055 | 759  | <b>0.027</b> | 347  | <b>0.036</b> | 759  | <b>0.027</b> | 0    | 1.000 | 0       | 0.993 | 0    | 1.000 |
| 125            | GO:0060760 | positive regulation of response to cytokine stimulus                      | 0   | 0.997 | 759  | <b>0.027</b> | 347  | <b>0.036</b> | 759  | <b>0.027</b> | 0    | 1.000 | 0       | 0.993 | 0    | 1.000 |
| 126            | GO:0001868 | regulation of complement activation lectin pathway                        | 867 | 0.055 | 759  | <b>0.027</b> | 347  | <b>0.036</b> | 759  | <b>0.027</b> | 0    | 1.000 | 0       | 0.993 | 0    | 1.000 |
| 127            | GO:0002369 | T cell cytokine production                                                | 0   | 0.993 | 253  | <b>0.048</b> | 116  | 0.082        | 253  | <b>0.049</b> | 0    | 1.000 | 0       | 0.992 | 0    | 1.000 |
| 128            | GO:0032743 | positive regulation of interleukin-2 production                           | 0   | 0.993 | 253  | <b>0.048</b> | 116  | 0.082        | 253  | <b>0.049</b> | 0    | 1.000 | 0       | 0.992 | 0    | 1.000 |
| 129            | GO:0010875 | positive regulation of cholesterol efflux                                 | 0   | 0.993 | 253  | <b>0.048</b> | 0    | 0.967        | 253  | <b>0.049</b> | 0    | 1.000 | 0       | 0.992 | 0    | 1.000 |
| 130            | GO:0032604 | granulocyte macrophage colony-stimulating factor production               | 289 | 0.097 | 253  | <b>0.048</b> | 116  | 0.082        | 253  | <b>0.049</b> | 0    | 1.000 | 0       | 0.992 | 0    | 1.000 |
| 131            | GO:0042253 | granulocyte macrophage colony-stimulating factor biosynthetic process     | 289 | 0.097 | 253  | <b>0.048</b> | 116  | 0.082        | 253  | <b>0.049</b> | 0    | 1.000 | 0       | 0.992 | 0    | 1.000 |
| 132            | GO:0002724 | regulation of T cell cytokine production                                  | 0   | 0.993 | 253  | <b>0.048</b> | 116  | 0.082        | 253  | <b>0.049</b> | 0    | 1.000 | 0       | 0.992 | 0    | 1.000 |
| 133            | GO:0010953 | regulation of protein maturation by peptide bond cleavage                 | 289 | 0.097 | 253  | <b>0.048</b> | 116  | 0.082        | 253  | <b>0.049</b> | 0    | 1.000 | 0       | 0.992 | 0    | 1.000 |
| 134            | GO:0034447 | very-low-density lipoprotein particle clearance                           | 0   | 0.993 | 253  | <b>0.048</b> | 0    | 0.967        | 253  | <b>0.049</b> | 0    | 1.000 | 0       | 0.992 | 0    | 1.000 |
| 135            | GO:0002694 | regulation of leukocyte activation                                        | 12  | 0.328 | 21   | <b>0.048</b> | 10   | 0.120        | 21   | <b>0.048</b> | 0    | 1.000 | 0       | 0.983 | 0    | 1.000 |
| 136            | GO:0009991 | response to extracellular stimulus                                        | 12  | 0.329 | 21   | <b>0.048</b> | 10   | 0.123        | 21   | <b>0.048</b> | 166  | 0.728 | 0       | 1.000 | 0    | 1.000 |
| 137            | GO:0032645 | regulation of granulocyte macrophage colony-stimulating factor production | 347 | 0.083 | 304  | <b>0.042</b> | 139  | 0.072        | 304  | <b>0.044</b> | 0    | 0.999 | 0       | 0.986 | 0    | 1.000 |
| 138            | GO:0002726 | positive regulation of T cell cytokine production                         | 0   | 0.979 | 304  | <b>0.042</b> | 139  | 0.072        | 304  | <b>0.044</b> | 0    | 0.999 | 0       | 0.986 | 0    | 1.000 |
| 139            | GO:0045939 | negative regulation of steroid metabolic process                          | 0   | 0.979 | 304  | <b>0.042</b> | 0    | 0.997        | 304  | <b>0.044</b> | 0    | 0.999 | 0       | 0.986 | 0    | 1.000 |
| 140            | GO:0030240 | muscle thin filament assembly                                             | 0   | 0.979 | 304  | <b>0.042</b> | 139  | 0.072        | 304  | <b>0.044</b> | 0    | 0.999 | 0       | 0.986 | 0    | 1.000 |

**Suppl. Table 8. Over-represented Gene Ontology biological process annotations associated with genes repressed by the indicated dietary treatments<sup>a</sup>**

| # <sup>b</sup> | Accession  | Biological Process                                                                           | E2  |       | PFOA |              | PFNA |       | PFDA |              | PFOS |       | 8:2FtOH |       | CLOF |       |
|----------------|------------|----------------------------------------------------------------------------------------------|-----|-------|------|--------------|------|-------|------|--------------|------|-------|---------|-------|------|-------|
|                |            |                                                                                              | E   | FDR   | E    | FDR          | E    | FDR   | E    | FDR          | E    | FDR   | E       | FDR   | E    | FDR   |
| 141            | GO:0031641 | regulation of myelination                                                                    | 347 | 0.083 | 304  | <b>0.042</b> | 139  | 0.072 | 304  | <b>0.044</b> | 0    | 0.999 | 0       | 0.986 | 0    | 1.000 |
| 142            | GO:0045423 | regulation of granulocyte macrophage colony-stimulating factor biosynthetic process          | 347 | 0.083 | 304  | <b>0.042</b> | 139  | 0.072 | 304  | <b>0.044</b> | 0    | 0.999 | 0       | 0.986 | 0    | 1.000 |
| 143            | GO:0010894 | negative regulation of steroid biosynthetic process                                          | 0   | 0.979 | 304  | <b>0.042</b> | 0    | 0.997 | 304  | <b>0.044</b> | 0    | 0.999 | 0       | 0.986 | 0    | 1.000 |
| 144            | GO:0034382 | chylomicron remnant clearance                                                                | 0   | 0.979 | 304  | <b>0.042</b> | 0    | 0.997 | 304  | <b>0.044</b> | 0    | 0.999 | 0       | 0.986 | 0    | 1.000 |
| 145            | GO:0034380 | high-density lipoprotein particle assembly                                                   | 0   | 0.979 | 304  | <b>0.042</b> | 0    | 0.997 | 304  | <b>0.044</b> | 0    | 0.999 | 0       | 0.986 | 0    | 1.000 |
| 146            | GO:0042159 | lipoprotein catabolic process                                                                | 0   | 0.979 | 304  | <b>0.042</b> | 0    | 0.997 | 304  | <b>0.044</b> | 0    | 0.999 | 0       | 0.986 | 0    | 1.000 |
| 147            | GO:0060333 | interferon-gamma-mediated signaling pathway                                                  | 0   | 0.986 | 304  | <b>0.042</b> | 139  | 0.072 | 304  | <b>0.044</b> | 0    | 0.999 | 0       | 0.986 | 0    | 1.000 |
| 148            | GO:0051249 | regulation of lymphocyte activation                                                          | 14  | 0.326 | 24   | <b>0.039</b> | 11   | 0.114 | 24   | <b>0.041</b> | 0    | 1.000 | 0       | 0.991 | 0    | 1.000 |
| 149            | GO:0031667 | response to nutrient levels                                                                  | 14  | 0.326 | 24   | <b>0.038</b> | 11   | 0.114 | 24   | <b>0.040</b> | 190  | 0.797 | 0       | 0.799 | 0    | 1.000 |
| 150            | GO:0002921 | negative regulation of humoral immune response                                               | 434 | 0.071 | 380  | <b>0.038</b> | 173  | 0.062 | 380  | <b>0.040</b> | 0    | 0.995 | 0       | 0.968 | 0    | 1.000 |
| 151            | GO:0045063 | T-helper 1 cell differentiation                                                              | 434 | 0.071 | 380  | <b>0.038</b> | 173  | 0.062 | 380  | <b>0.040</b> | 0    | 0.995 | 0       | 0.968 | 0    | 1.000 |
| 152            | GO:0042508 | tyrosine phosphorylation of Stat1 protein                                                    | 434 | 0.071 | 380  | <b>0.038</b> | 173  | 0.062 | 380  | <b>0.040</b> | 0    | 0.995 | 0       | 0.968 | 0    | 1.000 |
| 153            | GO:0060334 | regulation of interferon-gamma-mediated signaling pathway                                    | 0   | 0.926 | 380  | <b>0.038</b> | 173  | 0.062 | 380  | <b>0.040</b> | 0    | 0.995 | 0       | 0.968 | 0    | 1.000 |
| 154            | GO:0002825 | regulation of T-helper 1 type immune response                                                | 434 | 0.071 | 380  | <b>0.038</b> | 173  | 0.062 | 380  | <b>0.040</b> | 0    | 0.995 | 0       | 0.968 | 0    | 1.000 |
| 155            | GO:0030825 | positive regulation of cGMP metabolic process                                                | 0   | 0.917 | 380  | <b>0.038</b> | 0    | 0.706 | 380  | <b>0.040</b> | 0    | 0.995 | 0       | 0.968 | 0    | 1.000 |
| 156            | GO:0045624 | positive regulation of T-helper cell differentiation                                         | 434 | 0.071 | 380  | <b>0.038</b> | 173  | 0.062 | 380  | <b>0.040</b> | 0    | 0.995 | 0       | 0.968 | 0    | 1.000 |
| 157            | GO:0010544 | negative regulation of platelet activation                                                   | 0   | 0.917 | 380  | <b>0.038</b> | 0    | 0.706 | 380  | <b>0.040</b> | 0    | 0.995 | 0       | 0.968 | 0    | 1.000 |
| 158            | GO:0045824 | negative regulation of innate immune response                                                | 434 | 0.071 | 380  | <b>0.038</b> | 173  | 0.062 | 380  | <b>0.040</b> | 0    | 0.995 | 0       | 0.968 | 0    | 1.000 |
| 159            | GO:0002923 | regulation of humoral immune response mediated by circulating immunoglobulin                 | 434 | 0.071 | 380  | <b>0.038</b> | 173  | 0.062 | 380  | <b>0.040</b> | 0    | 0.995 | 0       | 0.968 | 0    | 1.000 |
| 160            | GO:0030828 | positive regulation of cGMP biosynthetic process                                             | 0   | 0.917 | 380  | <b>0.038</b> | 0    | 0.706 | 380  | <b>0.040</b> | 0    | 0.995 | 0       | 0.968 | 0    | 1.000 |
| 161            | GO:0002922 | positive regulation of humoral immune response                                               | 578 | 0.057 | 506  | <b>0.032</b> | 231  | 0.050 | 506  | <b>0.034</b> | 0    | 1.000 | 0       | 0.989 | 0    | 1.000 |
| 162            | GO:0045425 | positive regulation of granulocyte macrophage colony-stimulating factor biosynthetic process | 578 | 0.057 | 506  | <b>0.032</b> | 231  | 0.050 | 506  | <b>0.034</b> | 0    | 1.000 | 0       | 0.989 | 0    | 1.000 |
| 163            | GO:0042511 | positive regulation of tyrosine phosphorylation of Stat1 protein                             | 578 | 0.057 | 506  | <b>0.032</b> | 231  | 0.050 | 506  | <b>0.034</b> | 0    | 1.000 | 0       | 0.989 | 0    | 1.000 |
| 164            | GO:0010955 | negative regulation of protein maturation by peptide bond cleavage                           | 578 | 0.057 | 506  | <b>0.032</b> | 231  | 0.050 | 506  | <b>0.034</b> | 0    | 1.000 | 0       | 0.989 | 0    | 1.000 |
| 165            | GO:0002925 | positive regulation of humoral immune response mediated by circulating immunoglobulin        | 578 | 0.057 | 506  | <b>0.032</b> | 231  | 0.050 | 506  | <b>0.034</b> | 0    | 1.000 | 0       | 0.989 | 0    | 1.000 |
| 166            | GO:0002639 | positive regulation of immunoglobulin production                                             | 578 | 0.057 | 506  | <b>0.032</b> | 231  | 0.050 | 506  | <b>0.034</b> | 0    | 1.000 | 0       | 0.989 | 0    | 1.000 |
| 167            | GO:0045916 | negative regulation of complement activation                                                 | 578 | 0.057 | 506  | <b>0.032</b> | 231  | 0.050 | 506  | <b>0.034</b> | 0    | 1.000 | 0       | 0.989 | 0    | 1.000 |

**Suppl. Table 8. Over-represented Gene Ontology biological process annotations associated with genes repressed by the indicated dietary treatments<sup>a</sup>**

| # <sup>b</sup> | Accession  | Biological Process                                               | E2  |              | PFOA |              | PFNA |       | PFDA |              | PFOS |       | 8:2FtOH |       | CLOF |       |
|----------------|------------|------------------------------------------------------------------|-----|--------------|------|--------------|------|-------|------|--------------|------|-------|---------|-------|------|-------|
|                |            |                                                                  | E   | FDR          | E    | FDR          | E    | FDR   | E    | FDR          | E    | FDR   | E       | FDR   | E    | FDR   |
| 168            | GO:0030449 | regulation of complement activation                              | 578 | 0.057        | 506  | <b>0.032</b> | 231  | 0.050 | 506  | <b>0.034</b> | 0    | 1.000 | 0       | 0.989 | 0    | 1.000 |
| 169            | GO:0045625 | regulation of T-helper 1 cell differentiation                    | 578 | 0.057        | 506  | <b>0.032</b> | 231  | 0.050 | 506  | <b>0.034</b> | 0    | 1.000 | 0       | 0.989 | 0    | 1.000 |
| 170            | GO:0042510 | regulation of tyrosine phosphorylation of Stat1 protein          | 578 | 0.057        | 506  | <b>0.032</b> | 231  | 0.050 | 506  | <b>0.034</b> | 0    | 1.000 | 0       | 0.989 | 0    | 1.000 |
| 171            | GO:0001961 | positive regulation of cytokine-mediated signaling pathway       | 578 | 0.057        | 506  | <b>0.032</b> | 231  | 0.050 | 506  | <b>0.034</b> | 0    | 1.000 | 0       | 0.989 | 0    | 1.000 |
| 172            | GO:0060759 | regulation of response to cytokine stimulus                      | 0   | 0.990        | 506  | <b>0.032</b> | 231  | 0.050 | 506  | <b>0.034</b> | 0    | 1.000 | 0       | 0.989 | 0    | 1.000 |
| 173            | GO:0031401 | positive regulation of protein modification process              | 31  | 0.057        | 27   | <b>0.032</b> | 12   | 0.091 | 27   | <b>0.034</b> | 0    | 1.001 | 0       | 0.922 | 0    | 1.000 |
| 174            | GO:0050863 | regulation of T cell activation                                  | 17  | 0.305        | 29   | <b>0.032</b> | 13   | 0.083 | 29   | <b>0.034</b> | 0    | 0.999 | 0       | 0.990 | 0    | 1.000 |
| 175            | GO:0009894 | regulation of catabolic process                                  | 17  | 0.307        | 29   | <b>0.032</b> | 7    | 0.290 | 29   | <b>0.034</b> | 0    | 0.972 | 0       | 0.981 | 0    | 1.000 |
| 176            | GO:0045541 | negative regulation of cholesterol biosynthetic process          | 0   | 0.986        | 506  | <b>0.032</b> | 0    | 0.899 | 506  | <b>0.034</b> | 0    | 1.000 | 0       | 0.989 | 0    | 1.000 |
| 177            | GO:0032803 | regulation of low-density lipoprotein receptor catabolic process | 0   | 0.986        | 506  | <b>0.032</b> | 0    | 0.899 | 506  | <b>0.034</b> | 0    | 1.000 | 0       | 0.989 | 0    | 1.000 |
| 178            | GO:0032802 | low-density lipoprotein receptor catabolic process               | 0   | 0.986        | 506  | <b>0.032</b> | 0    | 0.899 | 506  | <b>0.034</b> | 0    | 1.000 | 0       | 0.989 | 0    | 1.000 |
| 179            | GO:0018212 | peptidyl-tyrosine modification                                   | 37  | <b>0.046</b> | 33   | <b>0.026</b> | 15   | 0.071 | 33   | <b>0.026</b> | 0    | 0.994 | 0       | 0.989 | 0    | 1.000 |
| 180            | GO:0045937 | positive regulation of phosphate metabolic process               | 38  | <b>0.048</b> | 33   | <b>0.026</b> | 15   | 0.071 | 33   | <b>0.026</b> | 0    | 1.000 | 0       | 0.998 | 0    | 1.000 |
| 181            | GO:0010562 | positive regulation of phosphorus metabolic process              | 38  | <b>0.048</b> | 33   | <b>0.026</b> | 15   | 0.071 | 33   | <b>0.026</b> | 0    | 1.000 | 0       | 0.998 | 0    | 1.000 |
| 182            | GO:0018108 | peptidyl-tyrosine phosphorylation                                | 38  | <b>0.048</b> | 33   | <b>0.026</b> | 15   | 0.071 | 33   | <b>0.026</b> | 0    | 1.000 | 0       | 0.998 | 0    | 1.000 |
| 183            | GO:0002696 | positive regulation of leukocyte activation                      | 19  | 0.294        | 33   | <b>0.026</b> | 15   | 0.071 | 33   | <b>0.026</b> | 0    | 1.000 | 0       | 0.998 | 0    | 1.000 |
| 184            | GO:0031644 | regulation of neurological system process                        | 18  | 0.301        | 31   | <b>0.026</b> | 7    | 0.282 | 31   | <b>0.026</b> | 0    | 0.974 | 0       | 0.986 | 0    | 1.000 |
| 185            | GO:0050867 | positive regulation of cell activation                           | 18  | 0.296        | 32   | <b>0.026</b> | 15   | 0.071 | 32   | <b>0.026</b> | 0    | 1.000 | 0       | 0.997 | 0    | 1.000 |
| 186            | GO:0051969 | regulation of transmission of nerve impulse                      | 0   | 0.999        | 32   | <b>0.026</b> | 7    | 0.278 | 32   | <b>0.026</b> | 0    | 1.000 | 0       | 0.997 | 0    | 1.000 |
| 187            | GO:0042327 | positive regulation of phosphorylation                           | 39  | 0.054        | 34   | <b>0.027</b> | 16   | 0.072 | 34   | <b>0.027</b> | 0    | 1.000 | 0       | 0.971 | 0    | 1.000 |
| 188            | GO:0001775 | cell activation                                                  | 5   | 0.411        | 13   | <b>0.027</b> | 4    | 0.234 | 13   | <b>0.027</b> | 0    | 1.000 | 0       | 0.995 | 0    | 1.000 |
| 189            | GO:0007584 | response to nutrient                                             | 21  | 0.281        | 37   | <b>0.027</b> | 17   | 0.062 | 37   | <b>0.027</b> | 293  | 0.876 | 0       | 0.995 | 0    | 1.000 |

<sup>a</sup> Gene ontology enrichment analysis was performed using High Throughput GoMiner. A significant enrichment of the GO term category was inferred when  $p < 0.05$  as determined by a one-sided Fisher's exact test after false discovery rate (FDR) correction. Significantly enriched GO terms are indicated in bold with yellow or orange highlight.

<sup>b</sup> Number (#) corresponds to position in Cluster Image Map presented in Figure 4.  
Abbreviations: E, enrichment value; FDR, false discovery rate-corrected  $p$ -value.

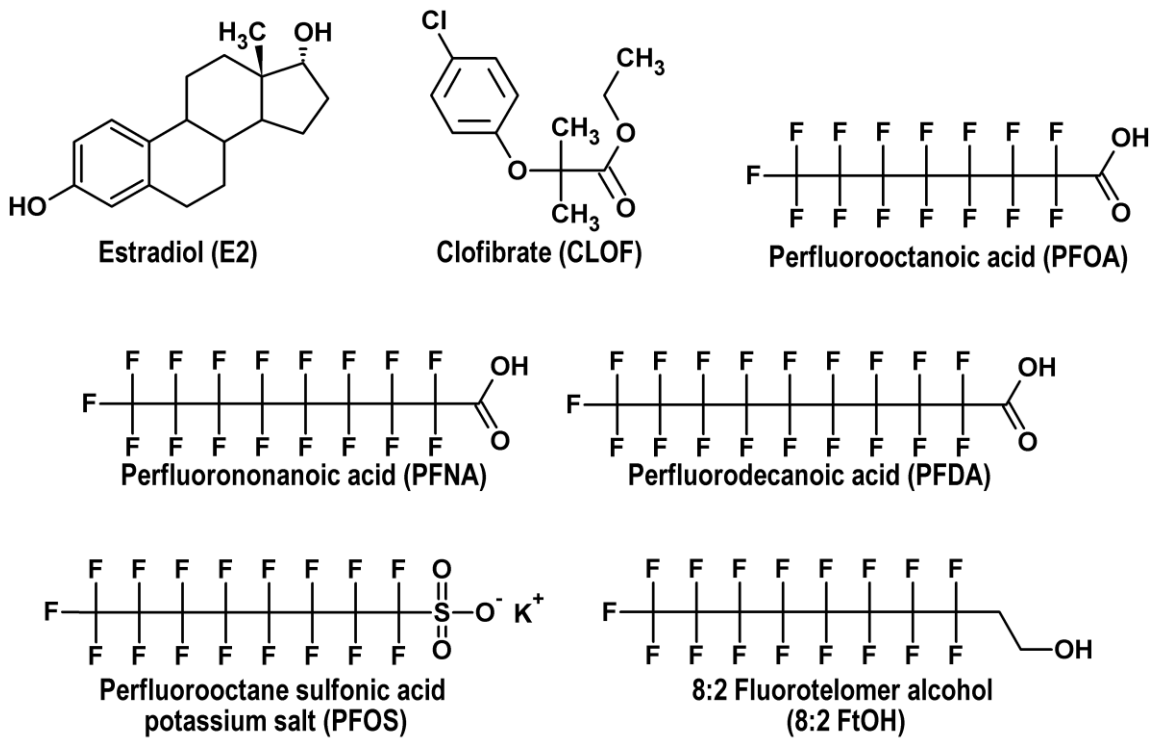

**Supplemental Figure 1.** Chemical structures of compounds tested for promotion of hepatocarcinogenesis in rainbow trout.

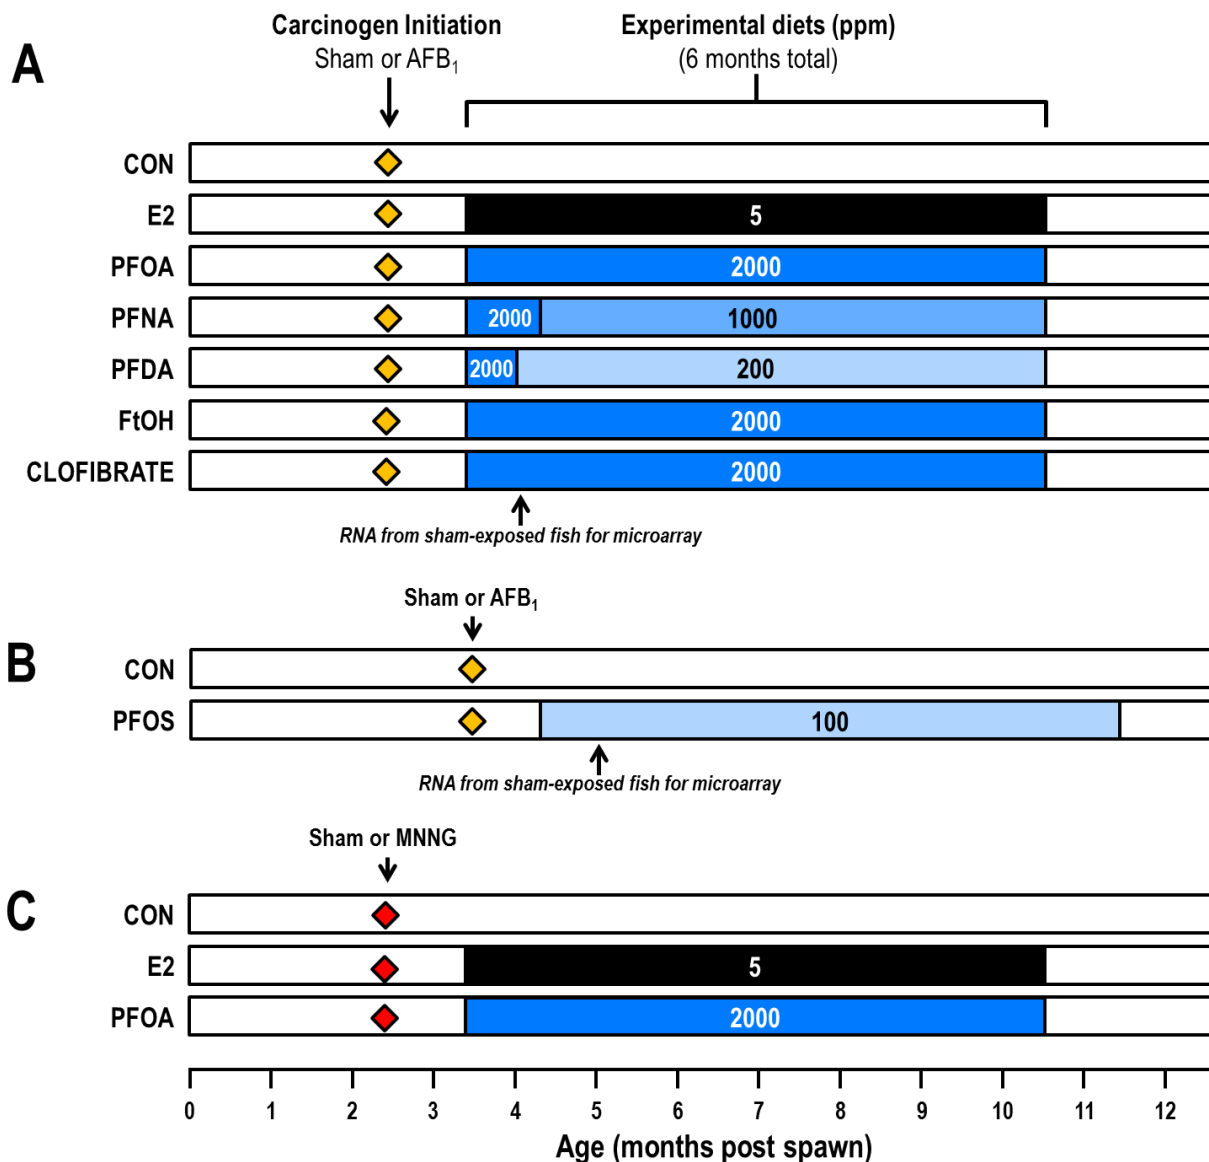

**Supplemental Figure 2. Outline of AFB<sub>1</sub> and MNNG tumor studies in trout with dietary polyfluorinated chemicals.** Fry were initiated at 10 weeks of age post spawn with 10 ppb AFB<sub>1</sub> (A) or 35 ppm MNNG (C), though one cohort of animals were initiated with AFB<sub>1</sub> at a slightly delayed age of 14 weeks (B). Four weeks after initiation, animals were fed the indicated experimental diets *ad libitum* (2.8-5.6% of body weight ration) for 6 months. PFOS was also initially tested at a diet concentration of 2000 ppm, though this exposure level was lethal in trout (data not shown). Consequently, a second cohort of trout fry (B) was initiated with a month delay compared to the other initiated groups, and a much lower diet concentration of 100 ppm PFOS was tested; as in the other treatment groups, the length of diet exposure was 6 months for PFOS-exposed trout. Necropsies for all treatment groups were performed at 12.5 months of age and were completed within one week.

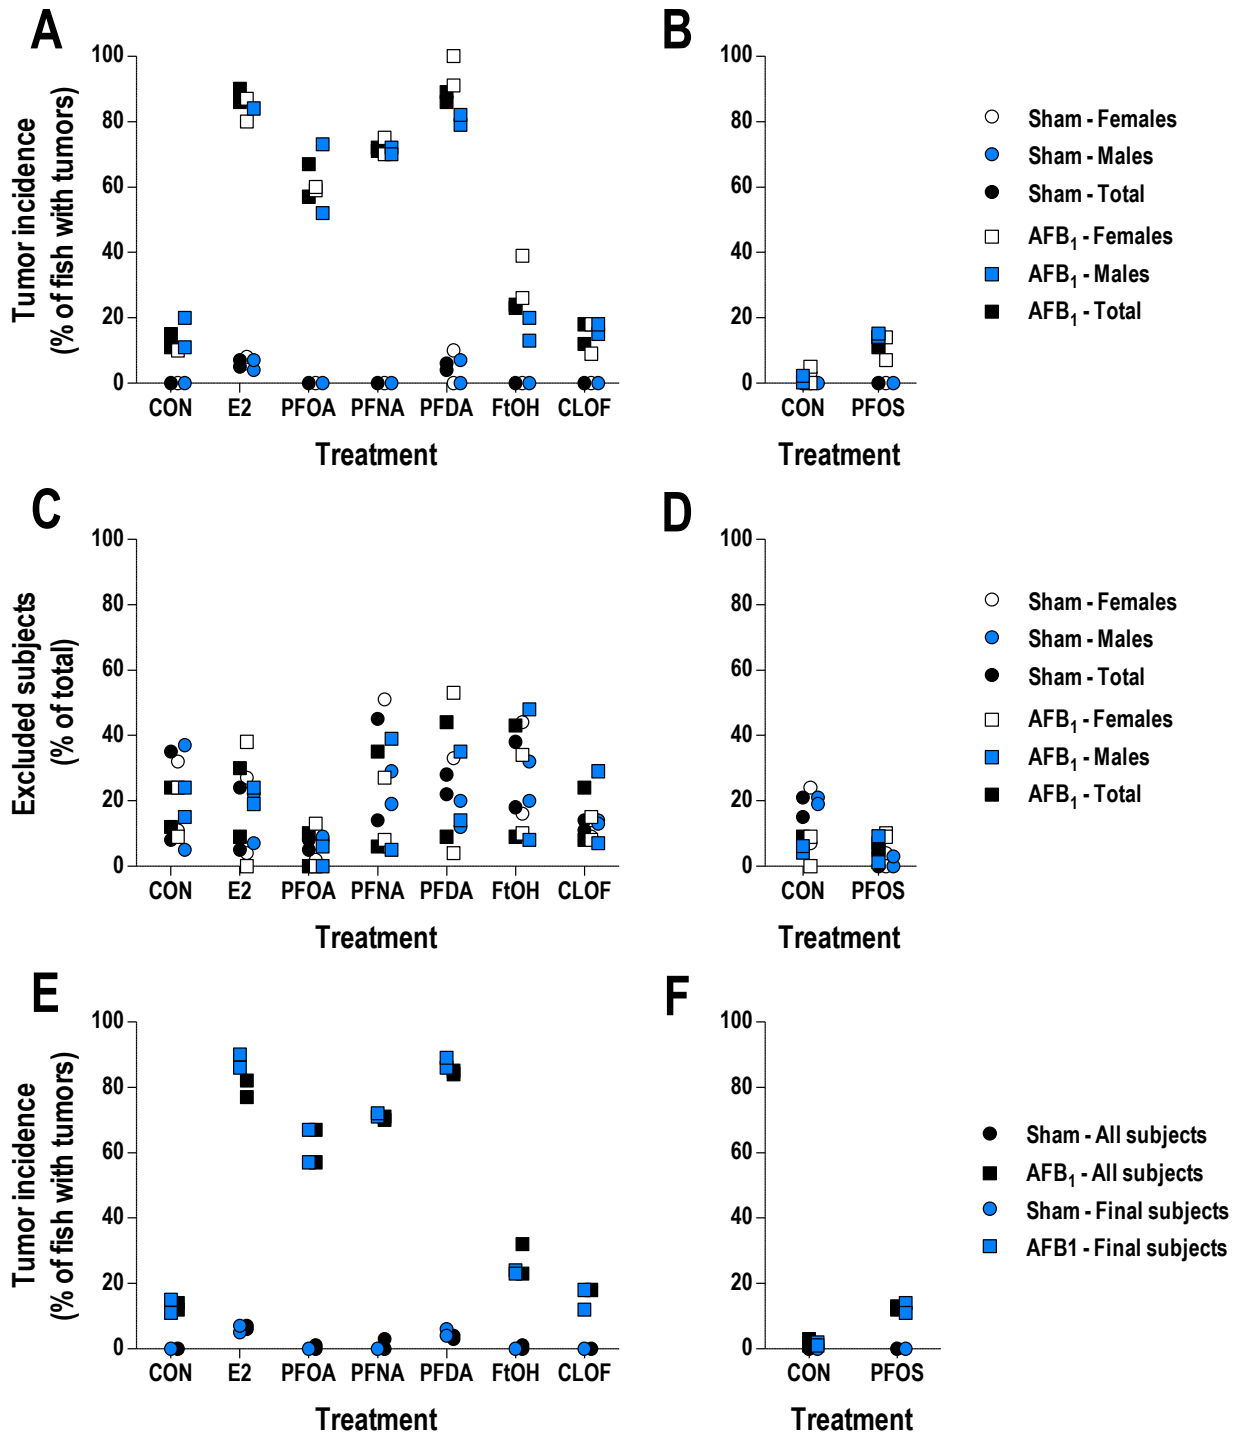

Supplemental Figure 3. Legend on following page.

**Supplemental Figure 3. Lack of effect of sex, experimental tank or idiopathic liver disease on AFB<sub>1</sub>-induced liver carcinogenesis.** (previous page) (A, B) Comparison of liver tumor incidence data between male and female fish and between duplicate experimental tanks. Values are tumor incidence in animals initiated by 10 ppm AFB<sub>1</sub> (at 10 weeks of age for panel A, 15 weeks for panel B) following a 6-month dietary exposure to the indicated treatments. Tumor outcome was not significantly different between male and female fish or between the duplicate tanks as determined by logistic regression analysis. (C, D) Frequency of observed idiopathic liver disease unrelated to experimental condition. Values shown are incidence of fish with symptoms of liver disease from unknown origin, characterized by pale or jaundiced livers, which were excluded from the final experimental analyses. With the exception of PFOA treatment ( $p < 0.05$ ), no effect of either carcinogen or dietary treatment on the frequency of idiopathic liver disease was observed in this study as determined by logistic regression analyses. (E, F) Liver tumor incidence in all experimental subjects compared to those with no symptoms of idiopathic liver disease (final subjects). No differences in tumor outcome were observed between the *all subject* and *final subject* data sets, as determined by logistic regression analyses. For all panels, symbols represent duplicate experimental tanks.

**Supplemental Figure 4. Impact of promotion diets on morphological parameters in trout.** (next page) Animals were initiated with 10 ppb AFB<sub>1</sub> or ethanol sham treatment at 10 weeks of age (A, D, G and J) or at 15 weeks (B, E, H and K); some animals were initiated with 35 ppm MNNG or DMSO sham treatment (C, F, I and L). See *Methods* for details on experimental diets. (A-C) Survival at termination of the study (12.5 months post spawn) for all treatment groups; in each figure, symbols represent duplicate tanks. (D-L) Average body weight, liver weight and liver somatic index (LSI = [liver weight/body weight]\*100) values are shown as box-whisker plots with 10-90 percentile whisker bars. \*,  $p < 0.05$ ; \*\*,  $p < 0.01$ , \*\*\*,  $p < 0.001$  compared to control diet (within initiation group, Sham/CON, AFB<sub>1</sub>/CON or MNNG/CON) as determined by the Kuskal-Wallis test with Dunn's multiple comparison test. ##,  $p < 0.05$ ; ###,  $p < 0.001$  compared to control diet (15wk initiation) as determined by unpaired Welch's *t*-test.

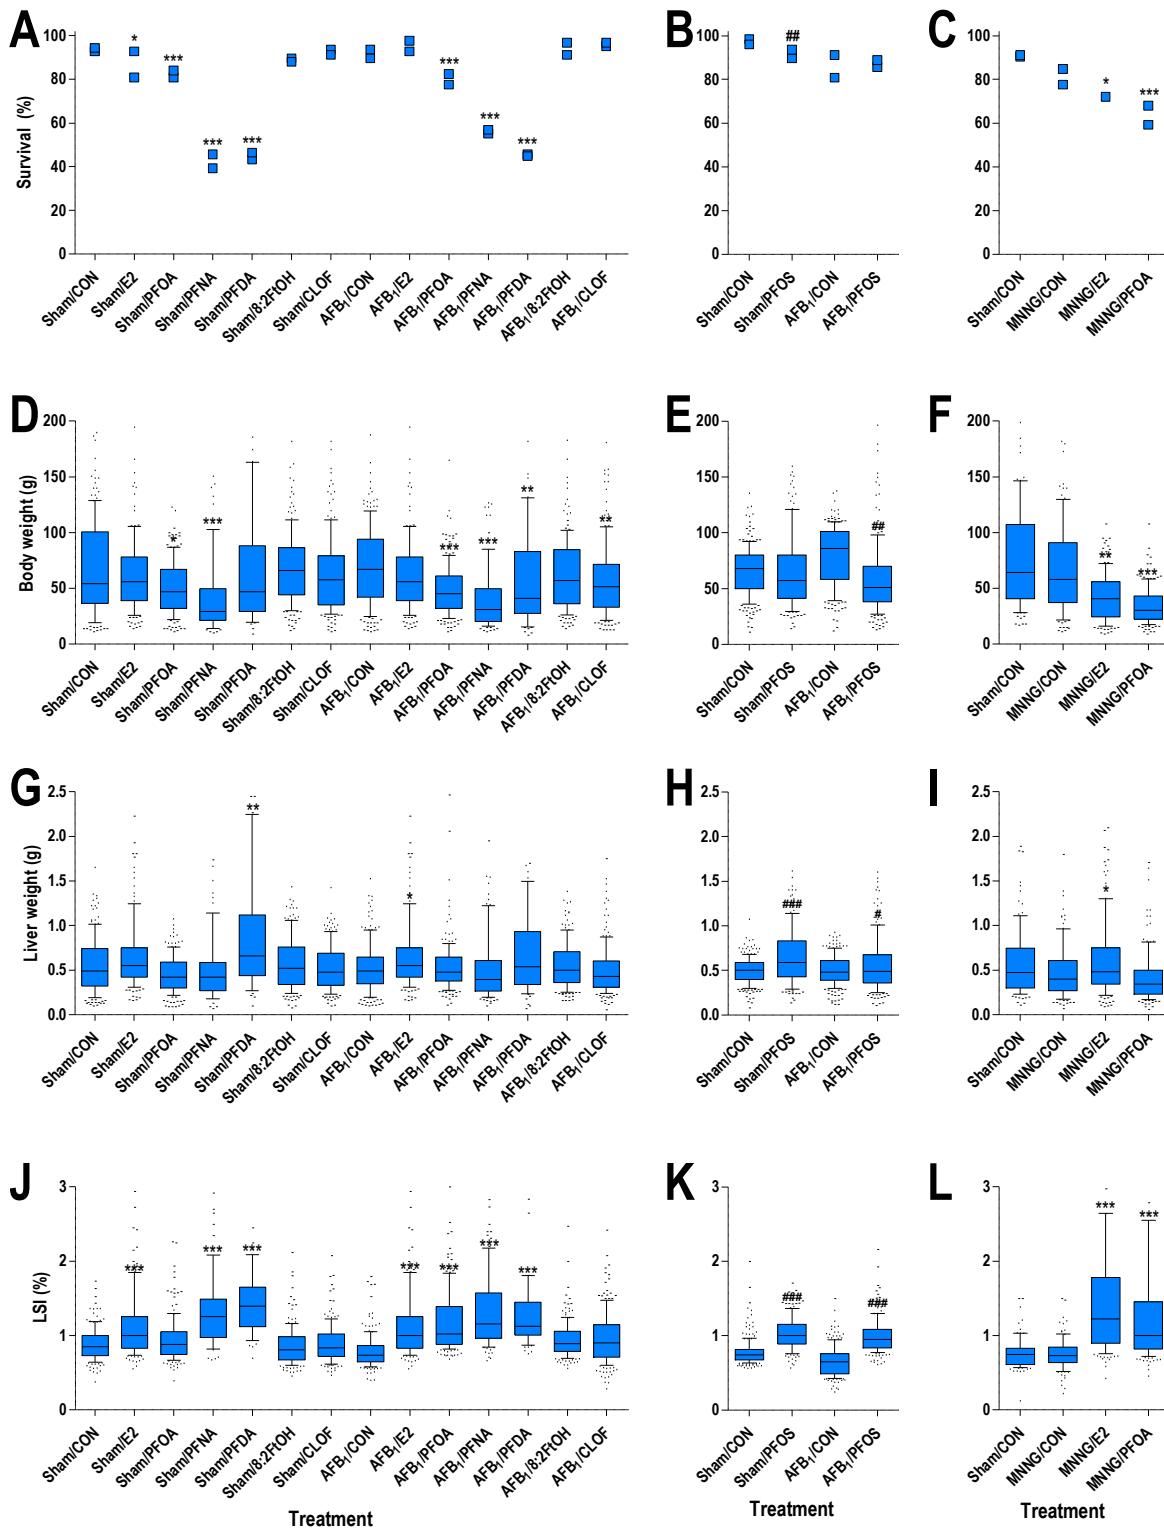

Supplemental Figure 4. Legend on previous page.



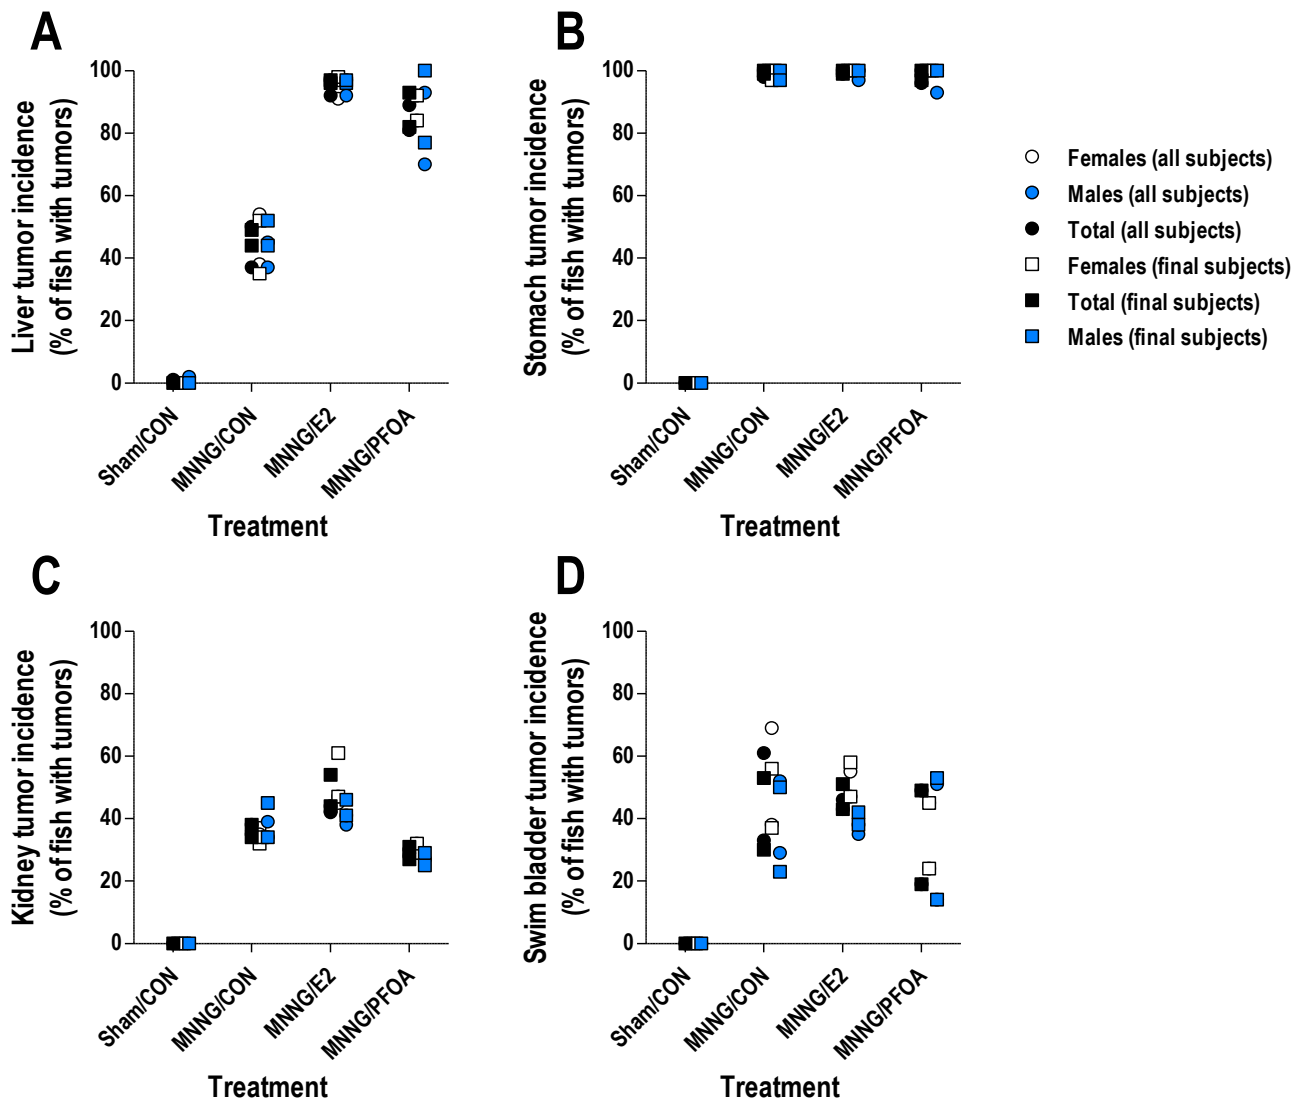

**Supplemental Figure 5. Lack of effect of sex, experimental tank or idiopathic liver disease on MNNG-induced carcinogenesis.** Comparisons of tumor incidence data for liver (A), stomach (B), kidney (C) and swim bladder (D) tumors between male and female fish and between duplicate experimental tanks. Values are tumor incidence in animals initiated by 35 ppm MNNG following a 6-month dietary exposure to the indicated treatments (see *Methods*). In each figure, symbols represent duplicate experimental tanks, and values for all experimental subjects and final subjects (no symptoms of idiopathic liver disease) are shown. For all tumor types, tumor outcome was not significantly different between male and female fish, between the duplicate tanks or between the *all subjects* and *final subjects* data groups; the single exception to this observation was for swim bladder tumors in MNNG/PFOA treatment group, where significant over-dispersion between experimental tanks was observed ( $p = 0.003$ ).

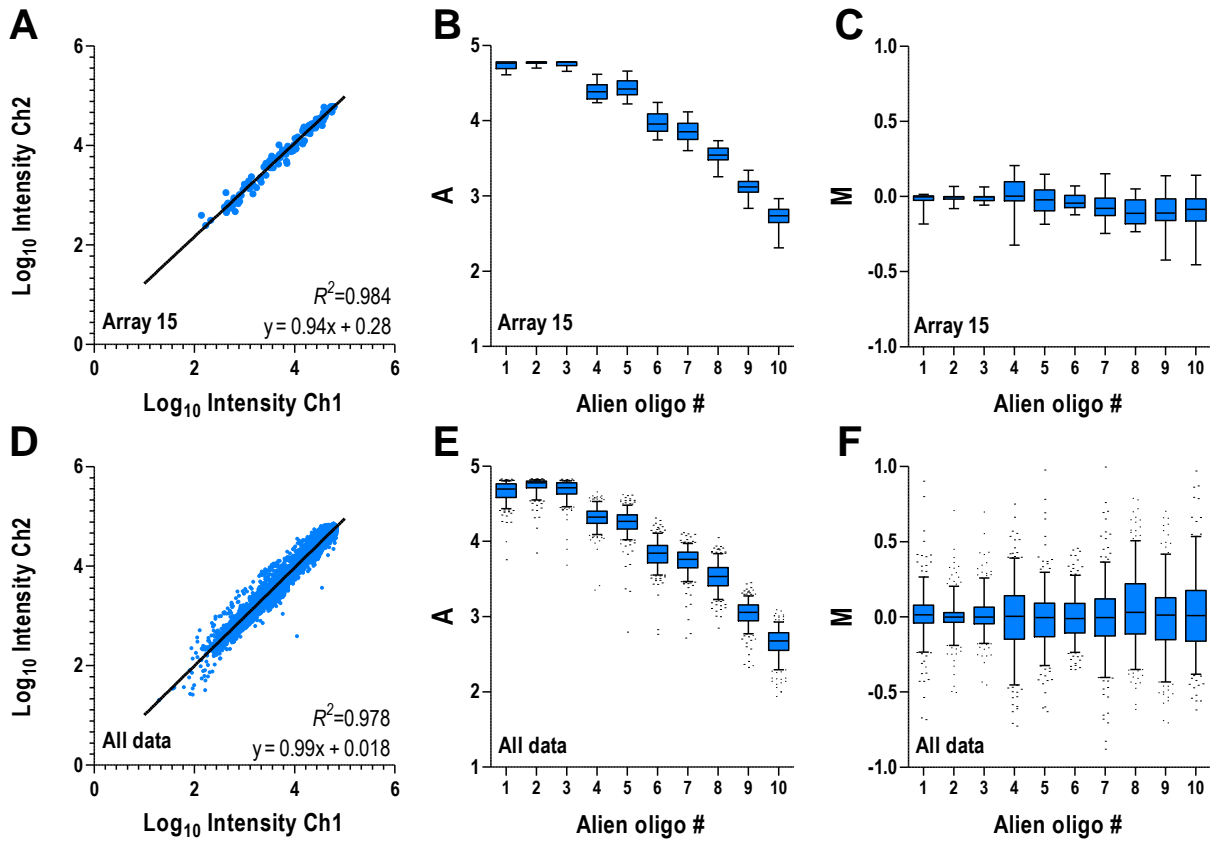

**Supplemental Figure 6. Quality control analysis of array hybridization.** Data for each SpotReport Alien Oligo feature for a representative array (A-C;  $N = 16$  spots per oligo per array) or for all arrays hybridized in this study (D-F;  $N = 640$ ) are shown. Pairwise correlation analyses of Ch1 and Ch2 intensities are shown for all SpotReport Alien features (A) or those for a representative array (D). Box and whiskers (10-90 confidence interval) plots of values for mean intensity (panels B and E;  $A = \log_{10}(\text{sqrt}(\text{Ch1} * \text{Ch2}))$ ) and the ratio of intensities (panels C and F;  $M = \log_2(\text{Ch1}/\text{Ch2})$ ) are also shown for the entire array and for array 15. In summary, non-specific hybridization to buffer spots was not detected, background fluorescence was consistently low across the array and there was no apparent spatial bias on these arrays. As expected, a very strong correlation between Ch1 and Ch2 intensities was observed with slopes of the linear regression trend lines of 0.94 and 0.99 for array 15 or all arrays, respectively, indicating that the potential problem of dye bias was eliminated by ratio-centering and Lowess-normalization of the raw data. The quality control analysis shows that these arrays can detect changes in gene expression across a broad range of signal intensities (three orders of magnitude) and that hybridization to the OSUrbt array was consistent and reproducible.

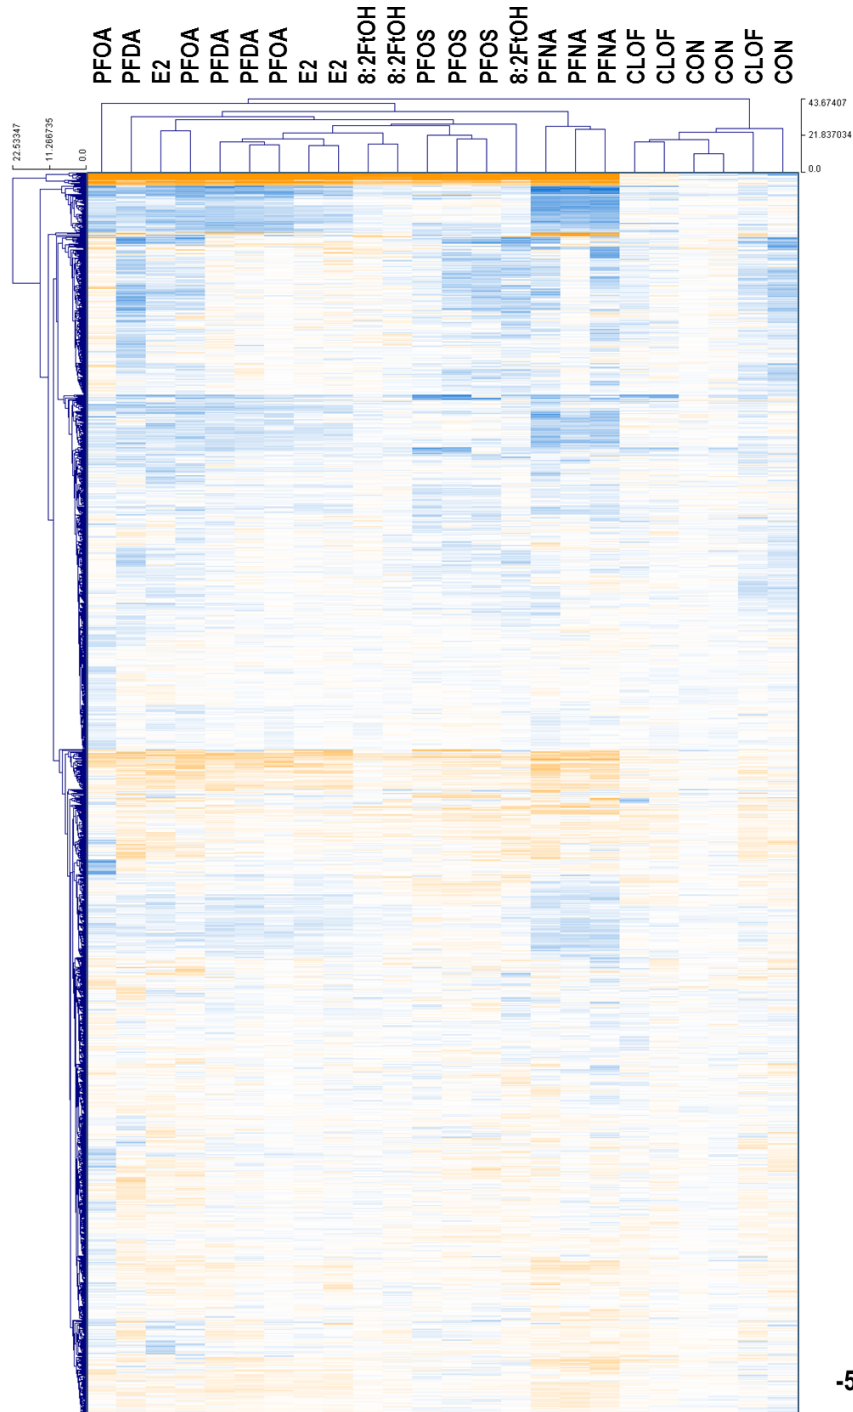

**Supplemental Figure 7. Unsupervised bidirectional hierarchical cluster analysis of hepatic gene expression profiles.** Bidirectional hierarchical clustering analysis was performed using sample data for either all array features;  $\log_2$  fold change expression values are shown for each biological replicate ( $n = 3$ ). Patterns of gene expression were clustered in two directions, by gene (left tree) and treatment (top tree), using the Euclidean distance method with average linkage.

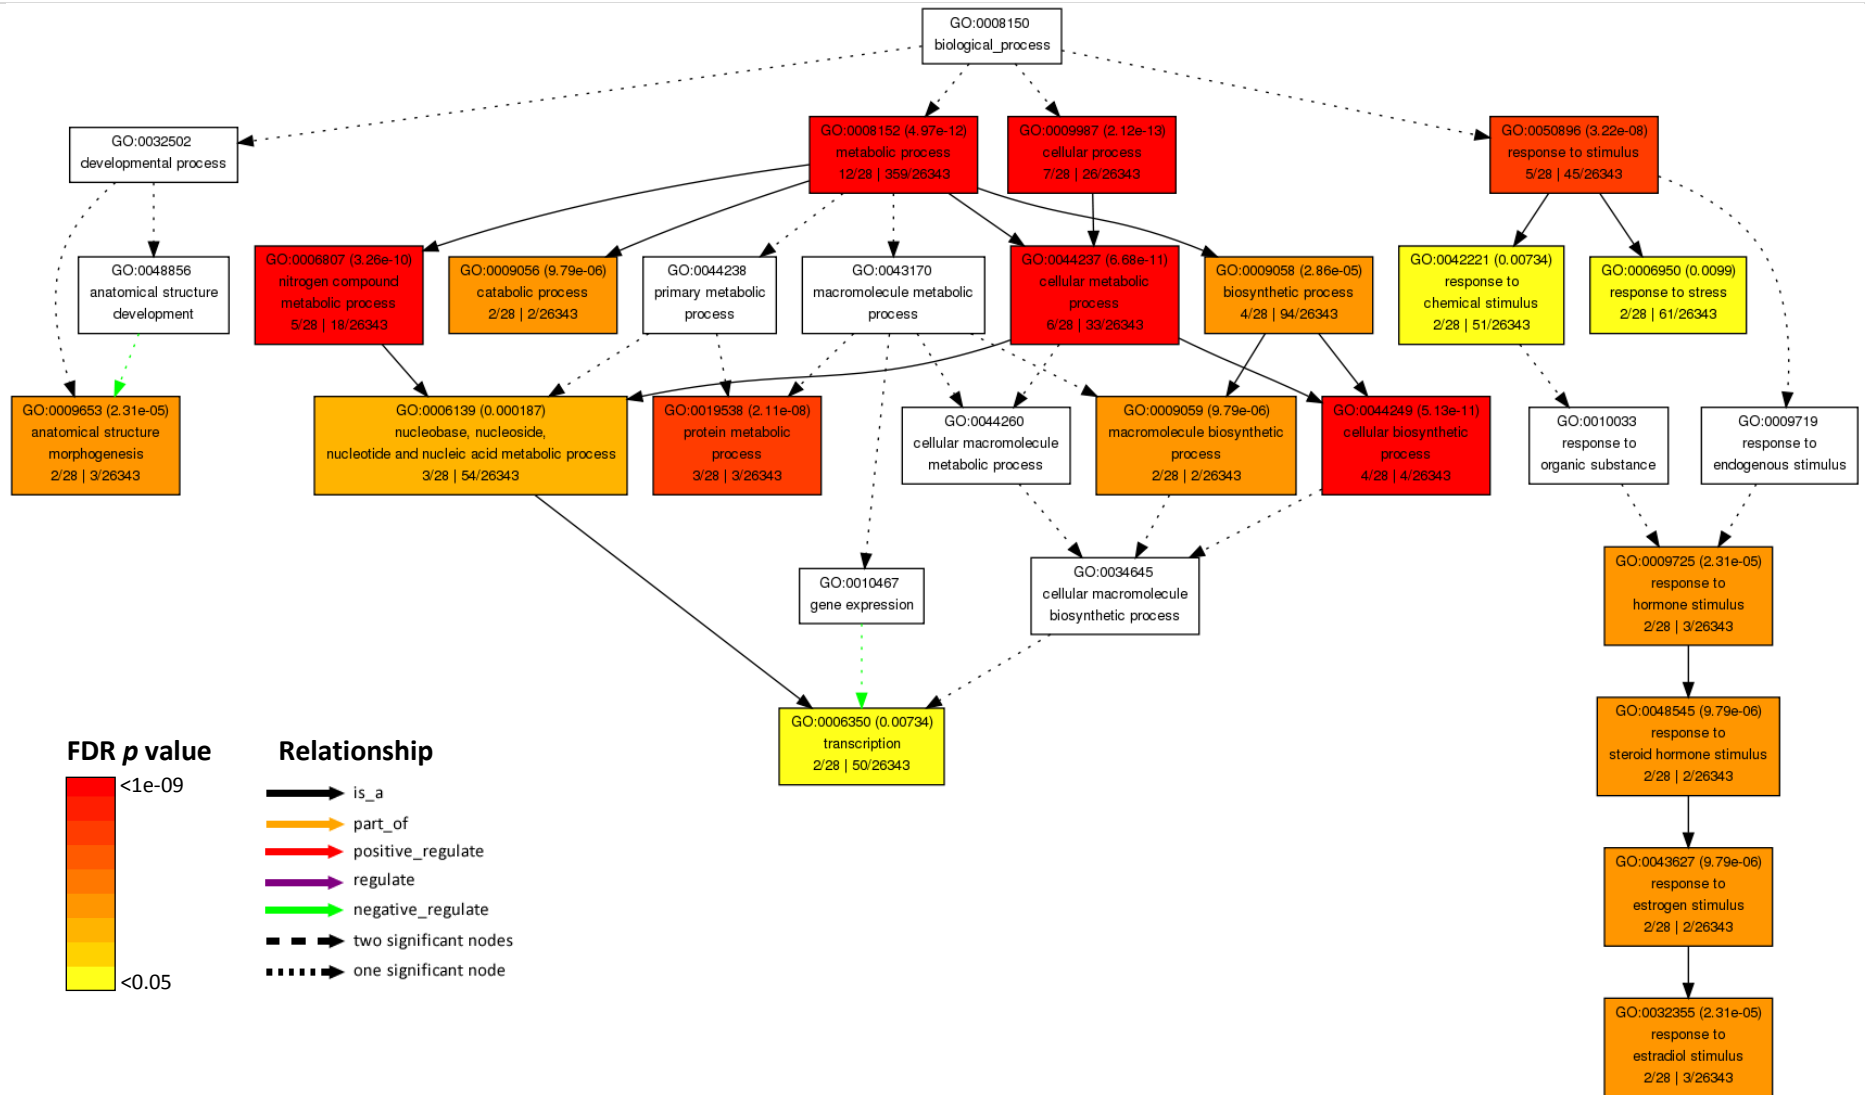

**Supplemental Figure 8. Directed acyclic graph for selected enriched GO terms associated with dietary E2.** GO term enrichment was performed using agriGO singular enrichment analysis tool against the zebrafish gene ontology database. The scale bar indicates level of significance (FDR-corrected  $p$ -value) for enriched GO terms, and the inset legend indicates the type of relationship between terms as depicted by different arrow types.

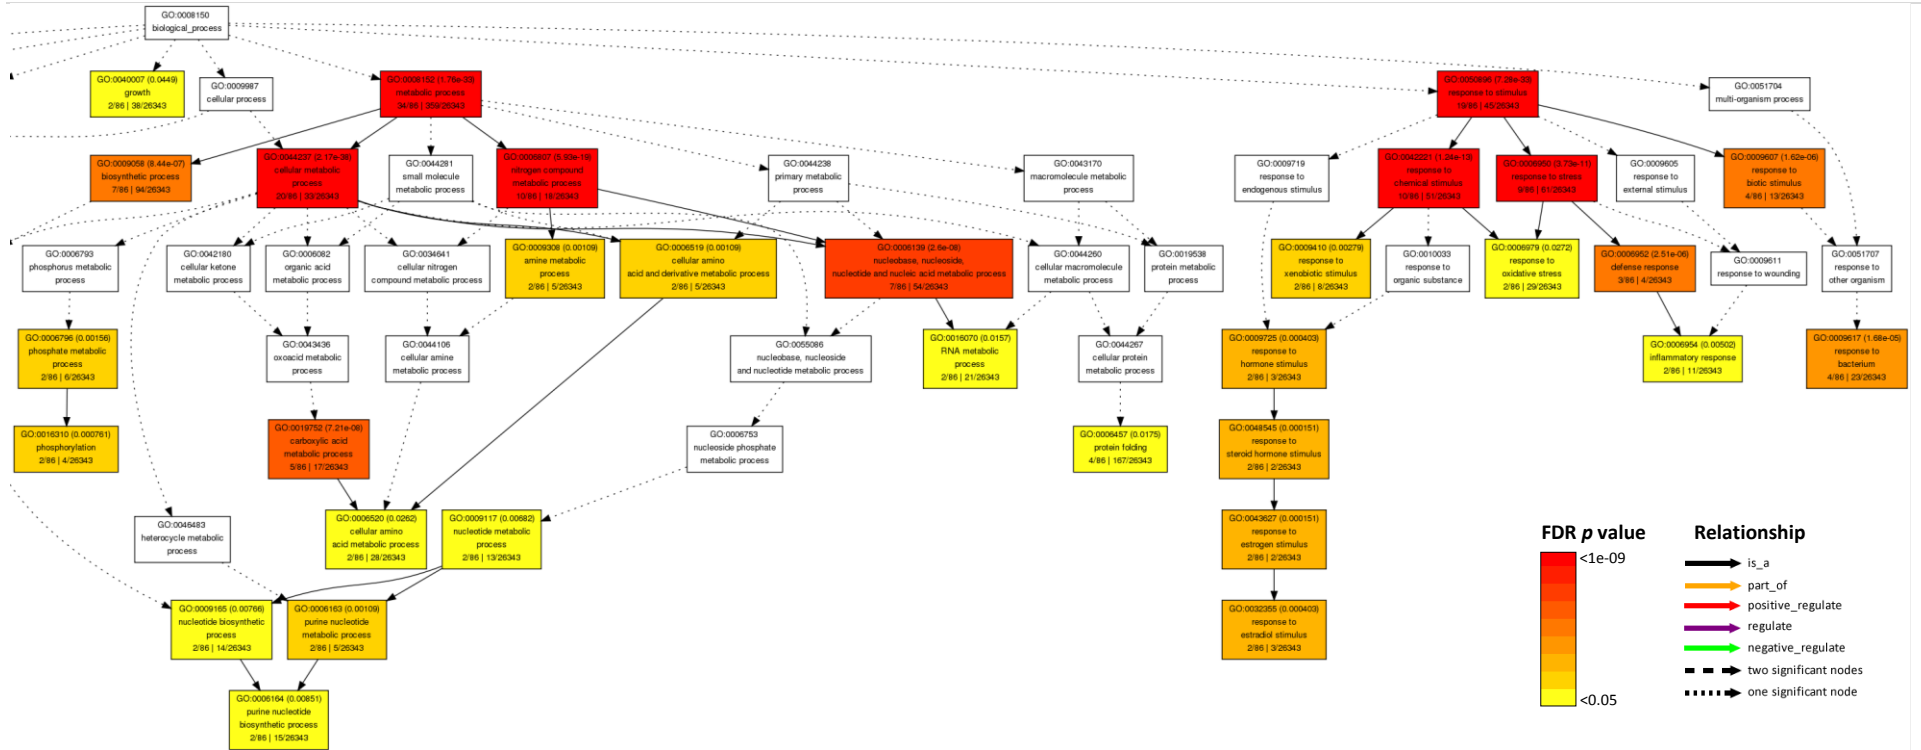

**Supplemental Figure 9. Directed acyclic graph (DAG) for selected enriched GO terms associated with dietary PFNA.** GO term enrichment was performed using agriGO singular enrichment analysis tool against the zebrafish gene ontology database. Because of the extensive network of GO terms associated with PFNA exposure, only a portion of the DAG is shown for comparison to the E2 DAG shown in Suppl. Fig. 8. The scale bar indicates level of significance (FDR-corrected  $p$ -value) for enriched GO terms, and the inset legend indicates the type of relationship between terms as depicted by different arrow types. Best viewed using Adobe PDF viewer.

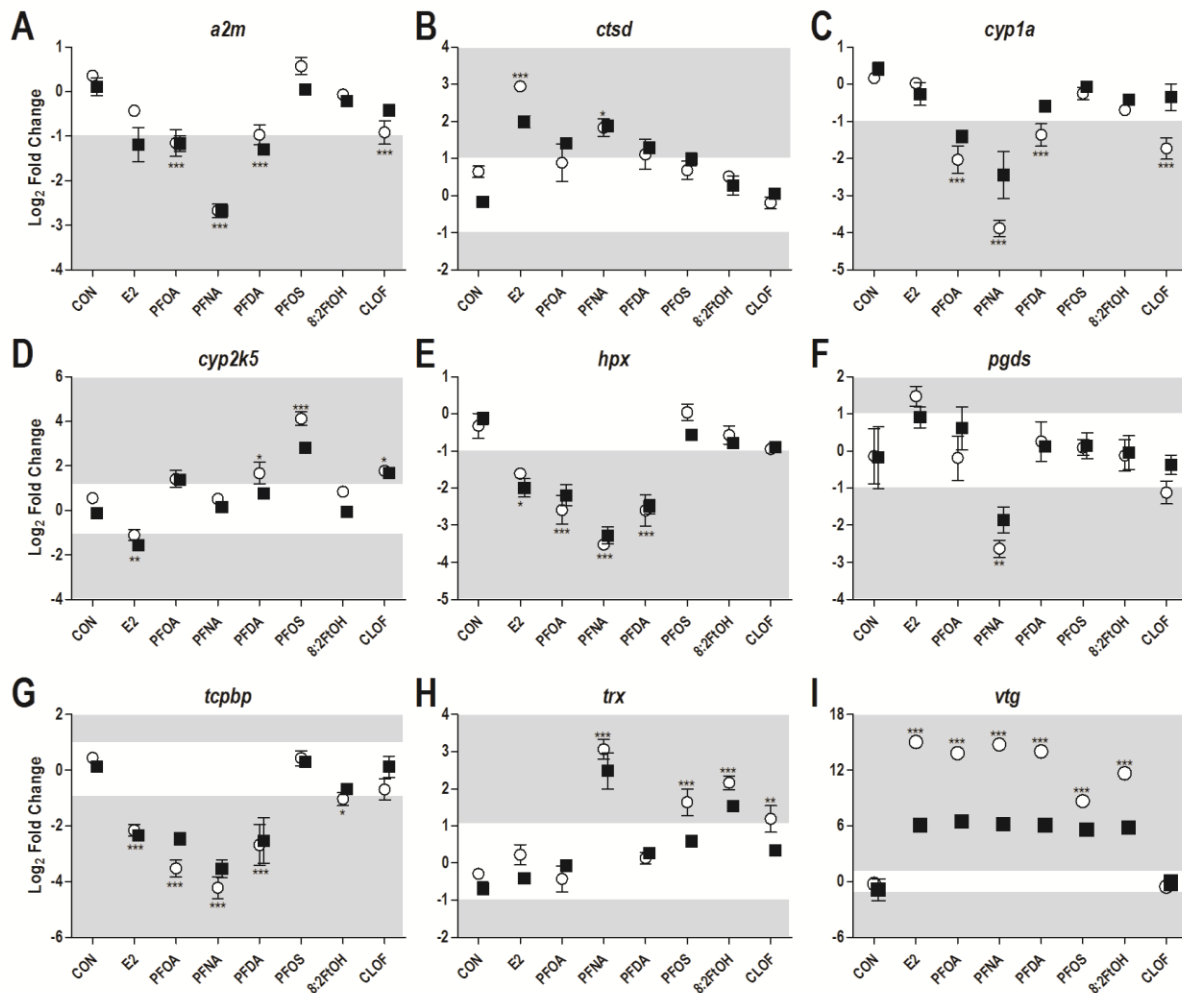

**Supplemental Figure 10. Validation of treatment-induced changes in hepatic gene expression determined by microarray analysis using qRT-PCR.** Values from qRT-PCR (open circles) are expressed as mean fold change ( $\log_2$ ) normalized to expression of housekeeping genes *actb*, *atp5b*, *gapdh* and *top2a* in a reference pool of cDNA from control treatments; values from the OSUrTb microarray (black squares) are expressed as mean fold change ( $\log_2$ ) compared to the control reference pool + SEM ( $N = 3$ ) for select genes including (A) *a2m*, (B) *ctsd*, (C) *cyp1a*, (D) *cyp2k5*, (E) *hpx*, (F) *pgds*, (G) *tcpbp*, (H) *trx* and (I) *vtg*. qRT-PCR values for the PFOS treatment were normalized to the appropriate time-matched reference pool to correctly reflect array hybridization conditions for this treatment group. Light gray shading in the plot area indicates regions of two-fold induction or repression of gene expression. Asterisks indicate that the qRT-PCR expression value is significantly different (\*,  $p < 0.05$ ; \*\*,  $p < 0.01$ ; \*\*\*,  $p < 0.001$ ) from control treatment (CON) as determined by the Kruskal-Wallis test with Dunnett's test for multiple comparisons. Results of statistical analyses of microarray data are provided in Supplementary Table 6.

### Supplemental References

Mortensen, A. S., Tolfen, C. C. and Arukwe, A. (2006). Gene expression patterns in estrogen (nonylphenol) and aryl hydrocarbon receptor agonists (PCB-77) interaction using rainbow trout (*Oncorhynchus mykiss*) primary hepatocyte culture. *J. Toxicol. Environ. Health A* **69**, 1-19.

Rees, C. B. and Li, W. (2004). Development and application of a real-time quantitative PCR assay for determining CYP1A transcripts in three genera of salmonids. *Aquat. Toxicol.* **66**, 357-68.

Tilton, S. C., Givan, S. A., Pereira, C. B., Bailey, G. S. and Williams, D. E. (2006). Toxicogenomic profiling of the hepatic tumor promoters indole-3-carbinol, 17 $\beta$ -estradiol and  $\beta$ -naphthoflavone in rainbow trout. *Toxicol. Sci.* **90**, 61-72.
